# Supplementary material for: Mapping Structural and Molecular Spatiotemporal Dynamics of Macaque Brain during Development and Aging
Source: Research Square preprint supplement (doi:10.21203/rs.3.rs-8062839/v1), 2025-11-25
Supplement: Supplementary file 1 [file e62351eff9a57beeb8974234.docx]

**Supplementary Materials**

**Title:** **Mapping Structural and Molecular Spatiotemporal Dynamics of Macaque Brain during Development and Aging**

# Supplementary Tables

## Table 1. MRI macaque subject information

| subject | species | age | weight | gender |
| --- | --- | --- | --- | --- |
| sub-M006 | Rhesus | 14 | 6 | 2 |
| sub-M007 | Rhesus | 14 | 6.8 | 2 |
| sub-M008 | Rhesus | 13 | 10 | 2 |
| sub-M009 | Rhesus | 12 | 5.6 | 2 |
| sub-M010 | Rhesus | 13 | 12 | 1 |
| sub-M011 | Rhesus | 13 | 14.3 | 2 |
| sub-M012 | Rhesus | 13 | 5.6 | 2 |
| sub-M013 | Rhesus | 13 | 7 | 2 |
| sub-M014 | Rhesus | 12 | 4.8 | 2 |
| sub-M015 | Rhesus | 12 | 7.4 | 2 |
| sub-M016 | Rhesus | 11 | 6 | 2 |
| sub-M017 | Rhesus | 12 | 6.8 | 2 |
| sub-M018 | Rhesus | 11 | 8 | 2 |
| sub-M019 | Rhesus | 12 | 4.8 | 2 |
| sub-M020 | Rhesus | 12 | 6 | 2 |
| sub-M021 | Rhesus | 11 | 6.72 | 2 |
| sub-M022 | Rhesus | 12 | 5.5 | 2 |
| sub-M023 | Rhesus | 12 | 7.4 | 2 |
| sub-M024 | Rhesus | 11 | 4 | 2 |
| sub-M025 | Rhesus | 11 | 6 | 2 |
| sub-M026 | Rhesus | 11 | 5.4 | 2 |
| sub-M027 | Rhesus | 11 | 4 | 2 |
| sub-M028_ses-01 | Rhesus | 10 | 6 | 2 |
| sub-M028_ses-02 | Rhesus | 10 | 6 | 2 |
| sub-M029 | Rhesus | 10 | 5 | 2 |
| sub-M030_ses-01 | Rhesus | 11 | 7 | 2 |
| sub-M030_ses-02 | Rhesus | 11 | 7.3 | 2 |
| sub-M031 | Rhesus | 10 | 10.7 | 1 |
| sub-M032 | Rhesus | 10 | 8.6 | 2 |
| sub-M033 | Rhesus | 10 | 11.5 | 2 |
| sub-M034 | Rhesus | 9 | 9.1 | 2 |
| sub-M035 | Rhesus | 9 | 11 | 2 |
| sub-M036 | Rhesus | 10 | 6 | 2 |
| sub-M037 | Rhesus | 10 | 7.3 | 2 |
| sub-M038 | Rhesus | 10 | 11 | 2 |
| sub-M039 | Rhesus | 10 | 7.4 | 2 |
| sub-M040 | Rhesus | 10 | 6 | 2 |
| sub-M041_ses-01 | Rhesus | 9 | 6.88 | 2 |
| sub-M041_ses-02 | Rhesus | 9 | 7 | 2 |
| sub-M042 | Rhesus | 9 | 8.2 | 1 |
| sub-M043 | Rhesus | 9 | 8 | 2 |
| sub-M044 | Rhesus | 9 | 9.5 | 1 |
| sub-M045 | Rhesus | 8 | 7 | 2 |
| sub-M046 | Rhesus | 9 | 9.22 | 1 |
| sub-M047 | Rhesus | 9 | 9.5 | 1 |
| sub-M048 | Rhesus | 8 | 8 | 2 |
| sub-M049 | Rhesus | 8 | 9.78 | 2 |
| sub-M050 | Rhesus | 9 | 7.1 | 2 |
| sub-M051 | Rhesus | 9 | 10 | 2 |
| sub-M052 | Rhesus | 8 | 9.7 | 2 |
| sub-M053 | Rhesus | 9 | 7.8 | 2 |
| sub-M054 | Rhesus | 8 | 7 | 2 |
| sub-M055 | Rhesus | 9 | 4.2 | 2 |
| sub-M056 | Rhesus | 7 | 9 | 2 |
| sub-M057 | Rhesus | 8 | 6.8 | 2 |
| sub-M058 | Rhesus | 7 | 5.02 | 2 |
| sub-M059 | Rhesus | 7 | 6 | 2 |
| sub-M060 | Rhesus | 6 | 5.4 | 2 |
| sub-M061 | Rhesus | 6 | 7.4 | 2 |
| sub-M062 | Rhesus | 4 | 6.5 | 2 |
| sub-M065 | Rhesus | 4 | 4.8 | 2 |
| sub-M083 | Rhesus | 18 | 7.25 | 2 |
| sub-M084 | Rhesus | 17 | 5.6 | 2 |
| sub-M087_ses-01 | Rhesus | 1.94 | 4.3 | 1 |
| sub-M088_ses-01 | Rhesus | 0.46 | 1 | 2 |
| sub-M088_ses-02 | Rhesus | 0.9 | 1.5 | 2 |
| sub-M088_ses-03 | Rhesus | 1.15 | 2.22 | 2 |
| sub-M089_ses-01 | Rhesus | 0.82 | 1.5 | 2 |
| sub-M089_ses-02 | Rhesus | 1.08 | 2.23 | 2 |
| sub-M090_ses-01 | Rhesus | 0.26 | 1.06 | 1 |
| sub-M090_ses-02 | Rhesus | 0.95 | 2.45 | 1 |
| sub-M091 | Rhesus | 13 | 5.3 | 2 |
| sub-M092 | Rhesus | 9 | 8.5 | 1 |
| sub-M093 | Rhesus | 8 | 4.4 | 2 |
| sub-M094 | Rhesus | 7 | 4.4 | 2 |
| sub-M095 | Rhesus | 7 | 8.4 | 2 |
| sub-M096 | Rhesus | 7 | 4.8 | 2 |
| sub-M097 | Rhesus | 7 | 3.4 | 2 |
| sub-M098 | Rhesus | 6 | 7.8 | 2 |
| sub-M099 | Rhesus | 6 | 6.4 | 2 |
| sub-M100 | Rhesus | 6 | 4.8 | 2 |
| sub-M101 | Rhesus | 5 | 3.3 | 2 |
| sub-M102 | Rhesus | 5 | 6.9 | 1 |
| sub-M103 | Rhesus | 5 | 6.8 | 2 |
| sub-M104 | Rhesus | 5 | 4.5 | 2 |
| sub-M105 | Rhesus | 3 | 5.4 | 1 |
| sub-M106 | Rhesus | 3 | 4.26 | 2 |
| sub-M107 | Rhesus | 18 | 6 | 2 |
| sub-M108 | Rhesus | 17 | 5 | 2 |
| sub-M109 | Rhesus | 17 | 4 | 2 |
| sub-M110 | Rhesus | 17 | 3 | 2 |
| sub-M111 | Rhesus | 17 | 4 | 2 |
| sub-M112 | Rhesus | 15 | 3 | 2 |
| sub-M113 | Rhesus | 14 | 10 | 1 |
| sub-M114 | Rhesus | 11 | 8 | 2 |
| sub-M115 | Rhesus | 11 | 4 | 2 |
| sub-M116 | Rhesus | 9 | 4.7 | 2 |
| sub-M117 | Rhesus | 9 | 6.2 | 2 |
| sub-M118 | Rhesus | 9 | 5 | 2 |
| sub-M119 | Rhesus | 7 | 3 | 2 |
| sub-M120 | Rhesus | 7 | 4.9 | 2 |
| sub-M121 | Rhesus | 7 | 6.3 | 2 |
| sub-M122 | Rhesus | 7 | 5 | 2 |
| sub-M123 | Rhesus | 6 | 4.5 | 2 |
| sub-M124 | Rhesus | 6 | 7.6 | 2 |
| sub-M125 | Rhesus | 6 | 4.4 | 2 |
| sub-M126 | Rhesus | 6 | 5.5 | 2 |
| sub-M127 | Rhesus | 6 | 7.9 | 2 |
| sub-M128 | Rhesus | 6 | 5.4 | 2 |
| sub-M129 | Rhesus | 6 | 4.7 | 2 |
| sub-M130 | Rhesus | 5 | 4.5 | 2 |
| sub-M131 | Rhesus | 5 | 4.2 | 2 |
| sub-M132 | Rhesus | 5 | 6 | 2 |
| sub-M133 | Rhesus | 5 | 5.8 | 2 |
| sub-M134 | Rhesus | 4 | 4 | 1 |
| sub-M135 | Rhesus | 4 | 4 | 1 |
| sub-M136 | Rhesus | 18 | 4.5 | 2 |
| sub-M137 | Rhesus | 14 | 5.3 | 2 |
| sub-M138 | Rhesus | 14 | 4.2 | 2 |
| sub-M139 | Rhesus | 11 | 3.5 | 2 |
| sub-M144 | Rhesus | 4 | 3 | 1 |
| sub-M145 | Rhesus | 4 | 4 | 2 |
| sub-M146 | Rhesus | 3 | 4 | 2 |
| sub-M147 | Rhesus | 1 | 2.9 | 1 |
| sub-M148 | Rhesus | 2 | 3.5 | 2 |
| sub-M149 | Rhesus | 2 | 3.6 | 1 |
| sub-M150 | Rhesus | 2 | 3.5 | 1 |
| sub-M151 | Rhesus | 1 | 2 | 1 |
| sub-M152 | Rhesus | 18 | 10.1 | 1 |
| sub-M153 | Rhesus | 18 | 11.5 | 1 |
| sub-M154 | Rhesus | 16 | 12 | 1 |
| sub-M155 | Rhesus | 16 | 12 | 1 |
| sub-M156 | Rhesus | 16 | 10.3 | 1 |
| sub-M157 | Rhesus | 16 | 7.4 | 2 |
| sub-M158 | Rhesus | 16 | 13.5 | 1 |
| sub-M159 | Rhesus | 16 | 15 | 1 |
| sub-M160 | Rhesus | 16 | 6.4 | 1 |
| sub-M161 | Rhesus | 14 | 5.7 | 2 |
| sub-M162 | Rhesus | 14 | 6.7 | 2 |
| sub-M163 | Rhesus | 13 | 6.6 | 1 |
| sub-M164 | Rhesus | 13 | 9.1 | 1 |
| sub-M165 | Rhesus | 13 | 7.1 | 2 |
| sub-M166 | Rhesus | 4 | 4.2 | 2 |
| sub-M167 | Rhesus | 3 | 4.1 | 2 |
| sub-M168 | Rhesus | 3 | 4 | 2 |
| sub-M169 | Rhesus | 3 | 4.98 | 1 |
| sub-M170 | Rhesus | 1 | 3.4 | 1 |
| sub-M171 | Rhesus | 1 | 2.7 | 1 |
| sub-M172 | Rhesus | 1 | 2.6 | 2 |
| sub-M173 | Rhesus | 1 | 2.8 | 1 |
| sub-M174 | Rhesus | 1 | 2.7 | 2 |
| sub-M175 | Rhesus | 1 | 2.4 | 2 |
| sub-M176 | Rhesus | 18 | 5.7 | 1 |
| sub-M177 | Rhesus | 18 | 10.4 | 1 |
| sub-M178 | Rhesus | 17 | 6.7 | 2 |
| sub-M179 | Rhesus | 17 | 6.5 | 2 |
| sub-M180 | Rhesus | 16 | 6.5 | 2 |
| sub-M181 | Rhesus | 15 | 8.2 | 2 |
| sub-M182 | Rhesus | 2 | 4 | 1 |
| sub-M183 | Rhesus | 2 | 3.1 | 2 |
| sub-M184 | Rhesus | 2 | 3.2 | 1 |
| sub-M185 | Rhesus | 2 | 4 | 1 |
| sub-M186 | Rhesus | 2 | 3.4 | 1 |
| sub-M187 | Rhesus | 2 | 3 | 1 |
| sub-M188 | Rhesus | 3 | 5.8 | 1 |
| sub-M189 | Rhesus | 15 | 5 | 2 |
| sub-M190 | Rhesus | 15 | 11.57 | 1 |
| sub-M191 | Rhesus | 15 | 15.29 | 1 |
| sub-M192 | Rhesus | 15 | 10.32 | 1 |

## Table 2. macaque brain sample information

| Sample | Species | Region | Age(Y) | Sex | Modality | Source |
| --- | --- | --- | --- | --- | --- | --- |
| R021111.2 | Rhesus | M1 | 2 | Female | snRNA-seq | KUST |
| R021111.7 | Rhesus | V1 | 2 | Female | snRNA-seq | KUST |
| R021111.9 | Rhesus | THA | 2 | Female | snRNA-seq | KUST |
| R021207.1 | Rhesus | DLPFC | 2 | Female | snRNA-seq | KUST |
| R021207.2 | Rhesus | M1 | 2 | Female | snRNA-seq | KUST |
| R021207.6 | Rhesus | DLPFC | 2 | Female | snRNA-seq | KUST |
| R021207.7 | Rhesus | V1 | 2 | Female | snRNA-seq | KUST |
| R021207.9 | Rhesus | THA | 2 | Female | snRNA-seq | KUST |
| R070102.4 | Rhesus | DLPFC | 7 | Female | snRNA-seq | KUST |
| R070102.9 | Rhesus | THA | 7 | Female | snRNA-seq | KUST |
| R071111.2 | Rhesus | M1 | 7 | Male | snRNA-seq | KUST |
| R071111.7 | Rhesus | V1 | 7 | Male | snRNA-seq | KUST |
| R071113.2 | Rhesus | M1 | 7 | Male | snRNA-seq | KUST |
| R071113.6 | Rhesus | DLPFC | 7 | Male | snRNA-seq | KUST |
| R071113.7 | Rhesus | V1 | 7 | Male | snRNA-seq | KUST |
| R071113.9 | Rhesus | THA | 7 | Male | snRNA-seq | KUST |
| R151127.2 | Rhesus | M1 | 15 | Female | snRNA-seq | KUST |
| R151127.6 | Rhesus | DLPFC | 15 | Female | snRNA-seq | KUST |
| R151127.7 | Rhesus | V1 | 15 | Female | snRNA-seq | KUST |
| R151127.9 | Rhesus | THA | 15 | Female | snRNA-seq | KUST |
| R171110.2 | Rhesus | M1 | 17 | Female | snRNA-seq | KUST |
| R171110.6 | Rhesus | DLPFC | 17 | Female | snRNA-seq | KUST |
| R171110.7 | Rhesus | V1 | 17 | Female | snRNA-seq | KUST |
| R171110.9 | Rhesus | THA | 17 | Female | snRNA-seq | KUST |

## Table 3. brain atlas location

| Region | Location |
| --- | --- |
| Left superior frontal gyrus | Cortex |
| Left middle frontal gyrus | Cortex |
| Left inferior frontal gyrus | Cortex |
| Left orbital frontoal gyrus | Cortex |
| Left precentral gyrus | Cortex |
| Left postcentral gyrus | Cortex |
| Left precuneus | Cortex |
| Left superior parietal lobule | Cortex |
| Left supramarginal gyrus | Cortex |
| Left superior temporal gyrus | Cortex |
| Left middle temporal gyrus | Cortex |
| Left inferior temporal gyrus | Cortex |
| Left occipital gyrus | Cortex |
| Left inferior occipital gyrus | Cortex |
| Left cuneus | Cortex |
| Left cingulate gyrus | Cortex |
| Left insula | Cortex |
| Left parahippocampal gyrus | Cortex |
| Left hippocampus | Subcortex |
| Left amygdalar nucleus | Subcortex |
| Left caudate nucleus | Subcortex |
| Left putamen | Subcortex |
| Left globus pallidus | Subcortex |
| Left nucleus accumbens | Subcortex |
| Left thalamus | Subcortex |
| Right superior frontal gyrus | Cortex |
| Right middle frontal gyrus | Cortex |
| Right inferior frontal gyrus | Cortex |
| Right orbital frontoal gyrus | Cortex |
| Right precentral gyrus | Cortex |
| Right postcentral gyrus | Cortex |
| Right precuneus | Cortex |
| Right superior parietal lobule | Cortex |
| Right supramarginal gyrus | Cortex |
| Right superior temporal gyrus | Cortex |
| Right middle temporal gyrus | Cortex |
| Right inferior temporal gyrus | Cortex |
| Right occipital gyrus | Cortex |
| Right inferior occipital gyrus | Cortex |
| Right cuneus | Cortex |
| Right cingulate gyrus | Cortex |
| Right insula | Cortex |
| Right parahippocampal gyrus | Cortex |
| Right hippocampus | Subcortex |
| Right amygdalar nucleus | Subcortex |
| Right caudate nucleus | Subcortex |
| Right putamen | Subcortex |
| Right globus pallidus | Subcortex |
| Right nucleus accumbens | Subcortex |
| Right thalamus | Subcortex |

# Supplementary Figures


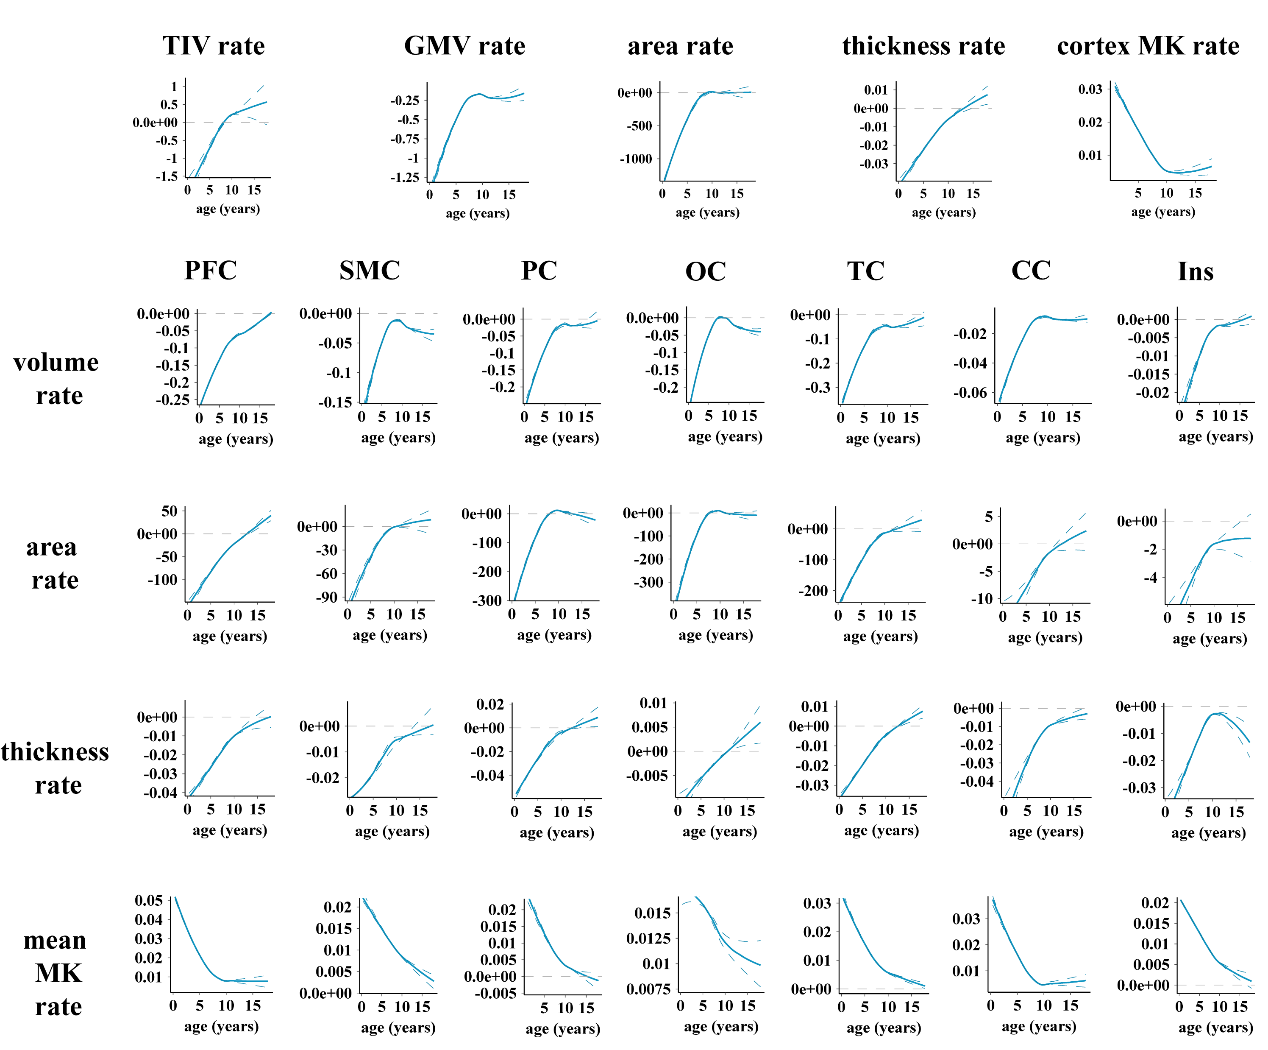


**Figure S1.** Developmental rates of global and regional cortical structural indices in macaques from 0 to 18 years old. This figure illustrates the age-related rate of change in global structural indices across the macaque brain, as well as the developmental rates of volume, surface area, cortical thickness, and mean MK across eight anatomically defined cortical regions including PFC, SMC, PC, OC, TC, CC, Ins(insula).


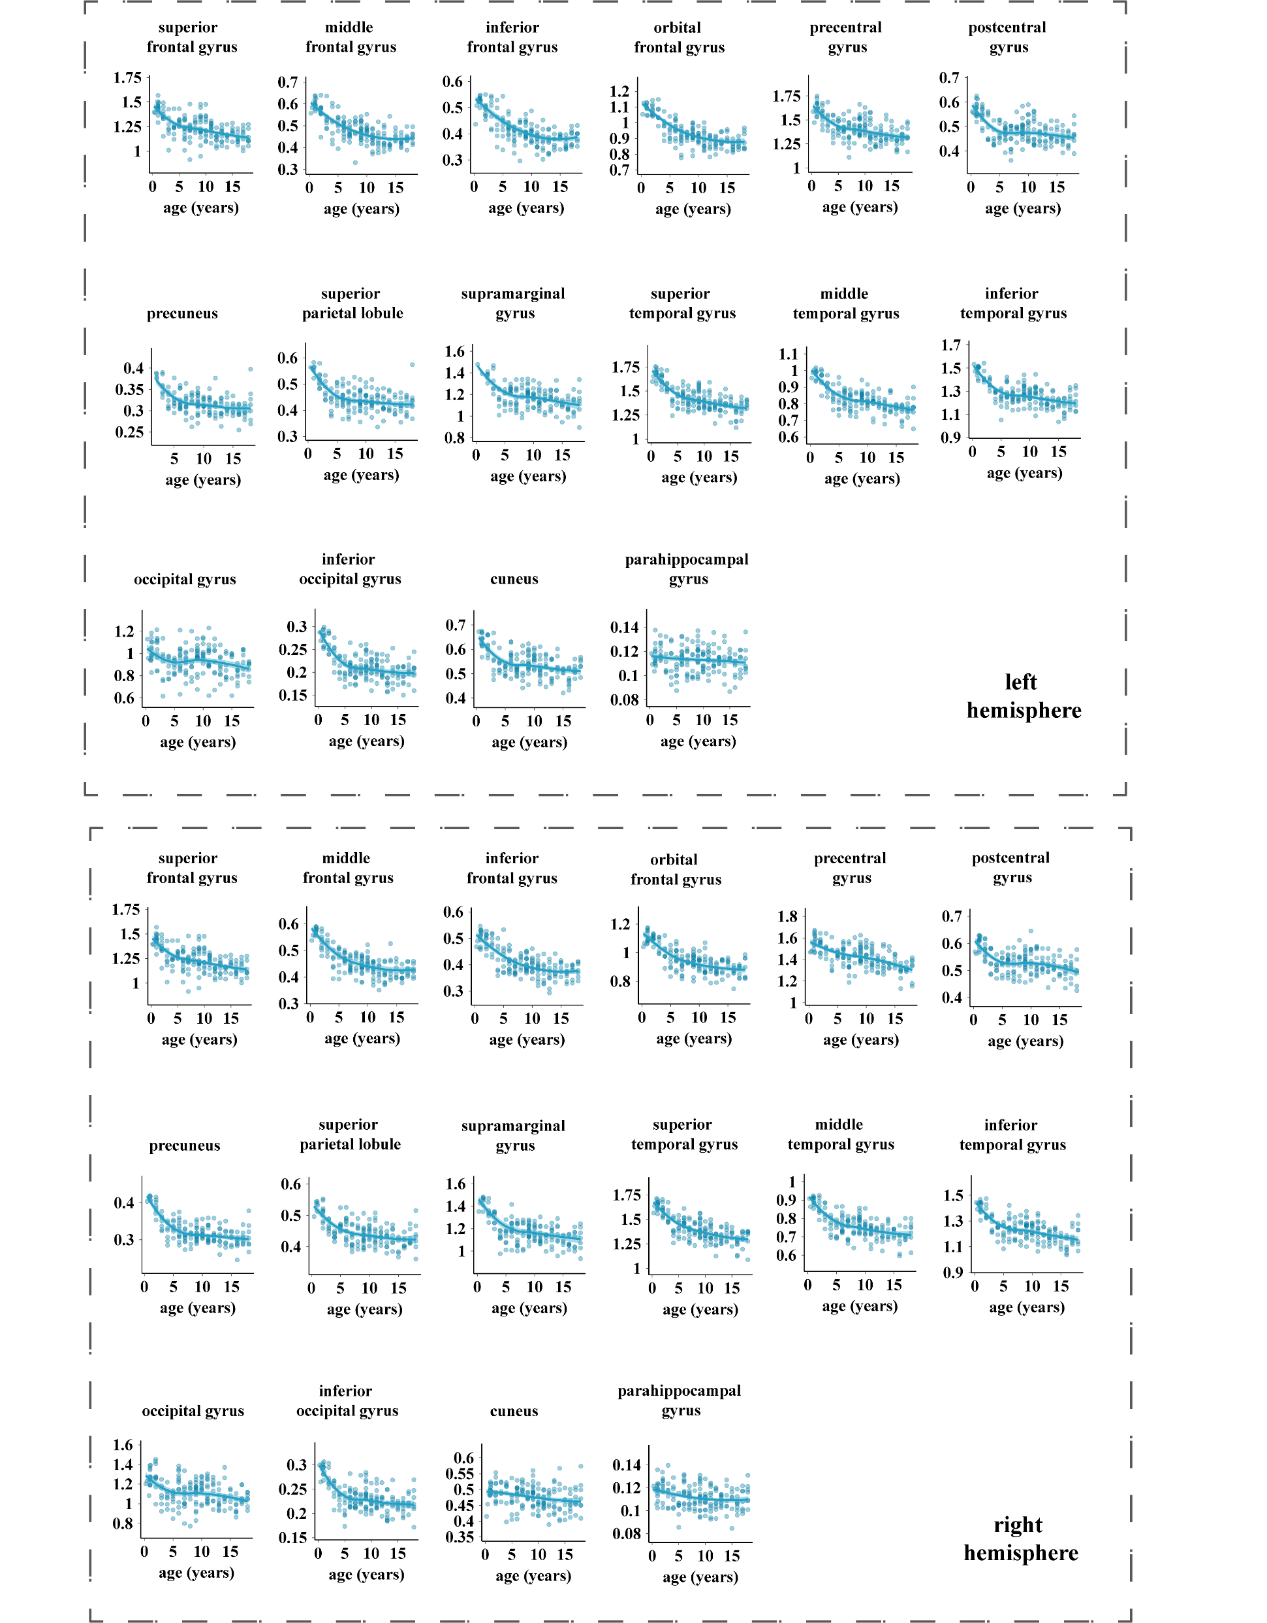


**Figure S2.** Mapping the developmental and aging trajectories of gray matter volume across fine-grained cortical regions in macaques from 0 to 18 years of age.


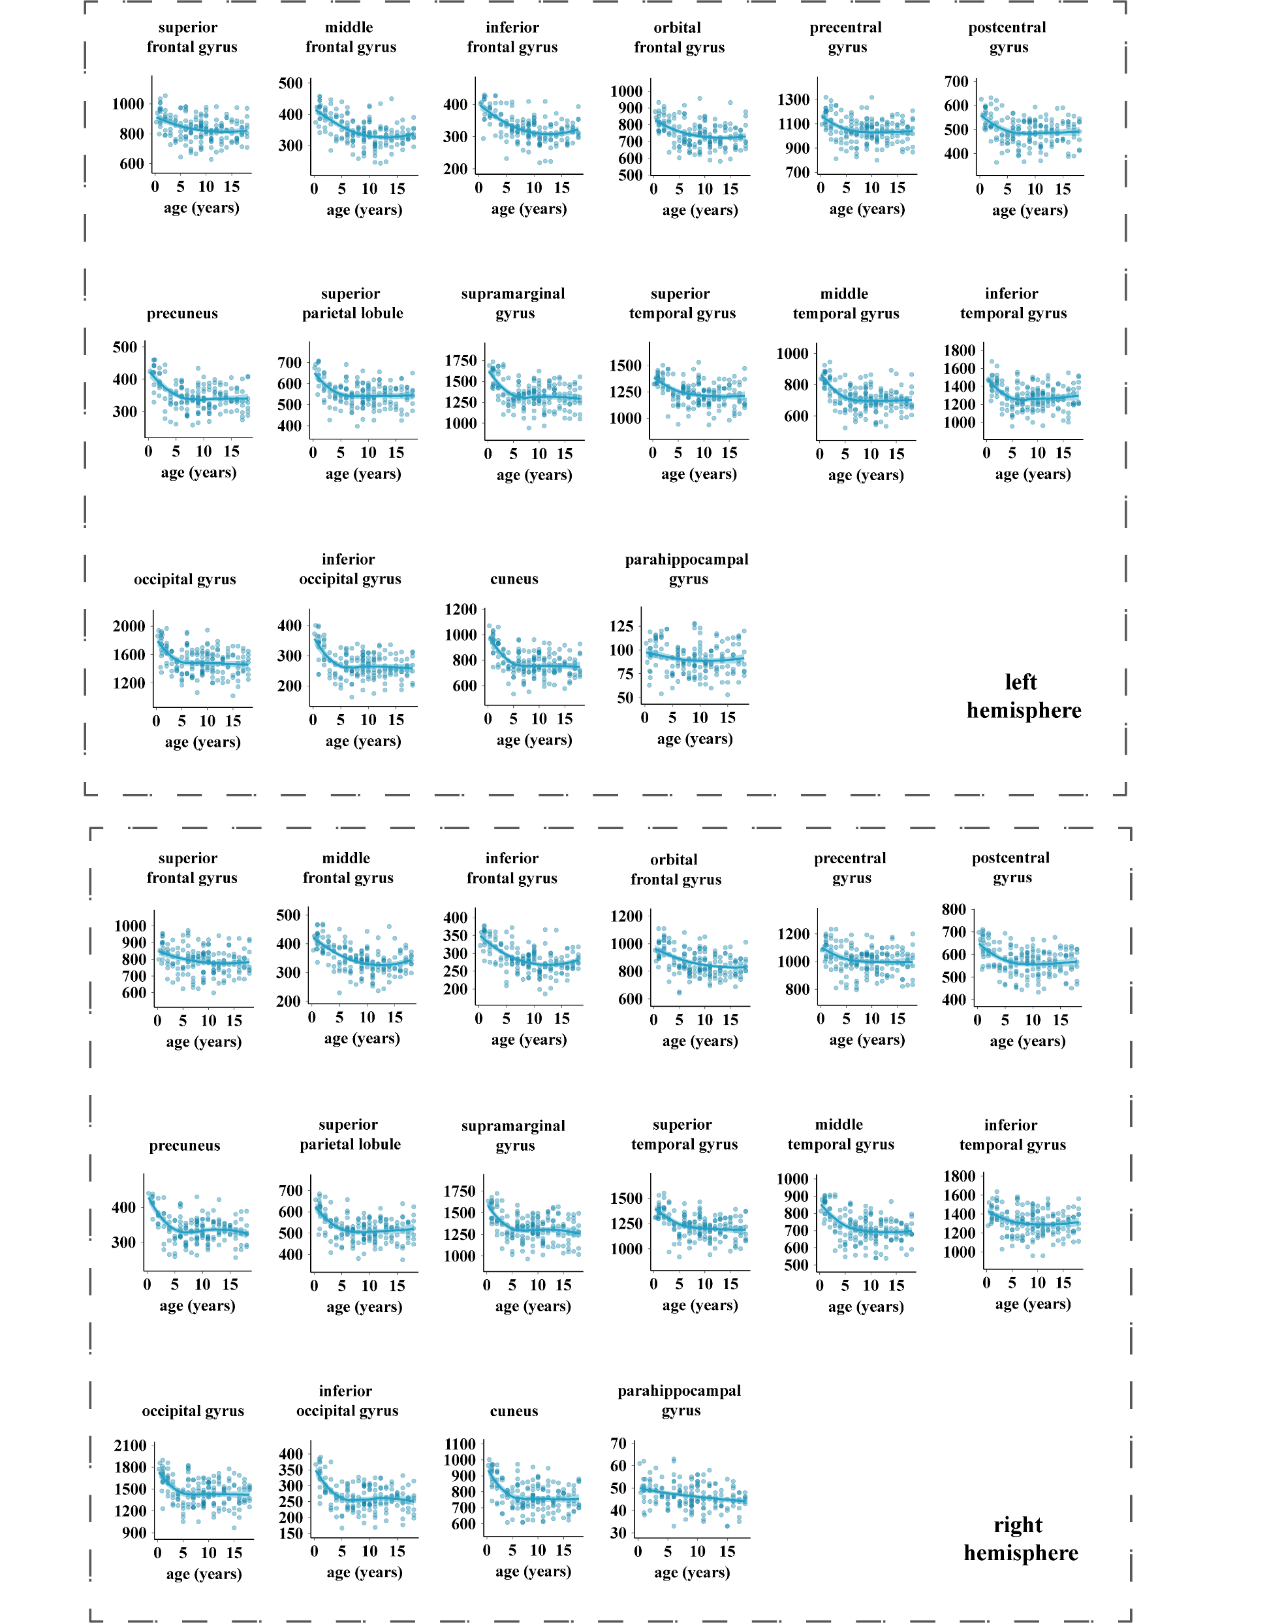


**Figure S3.** Mapping the developmental and aging trajectories of surface area across fine-grained cortical regions in macaques from 0 to 18 years of age.


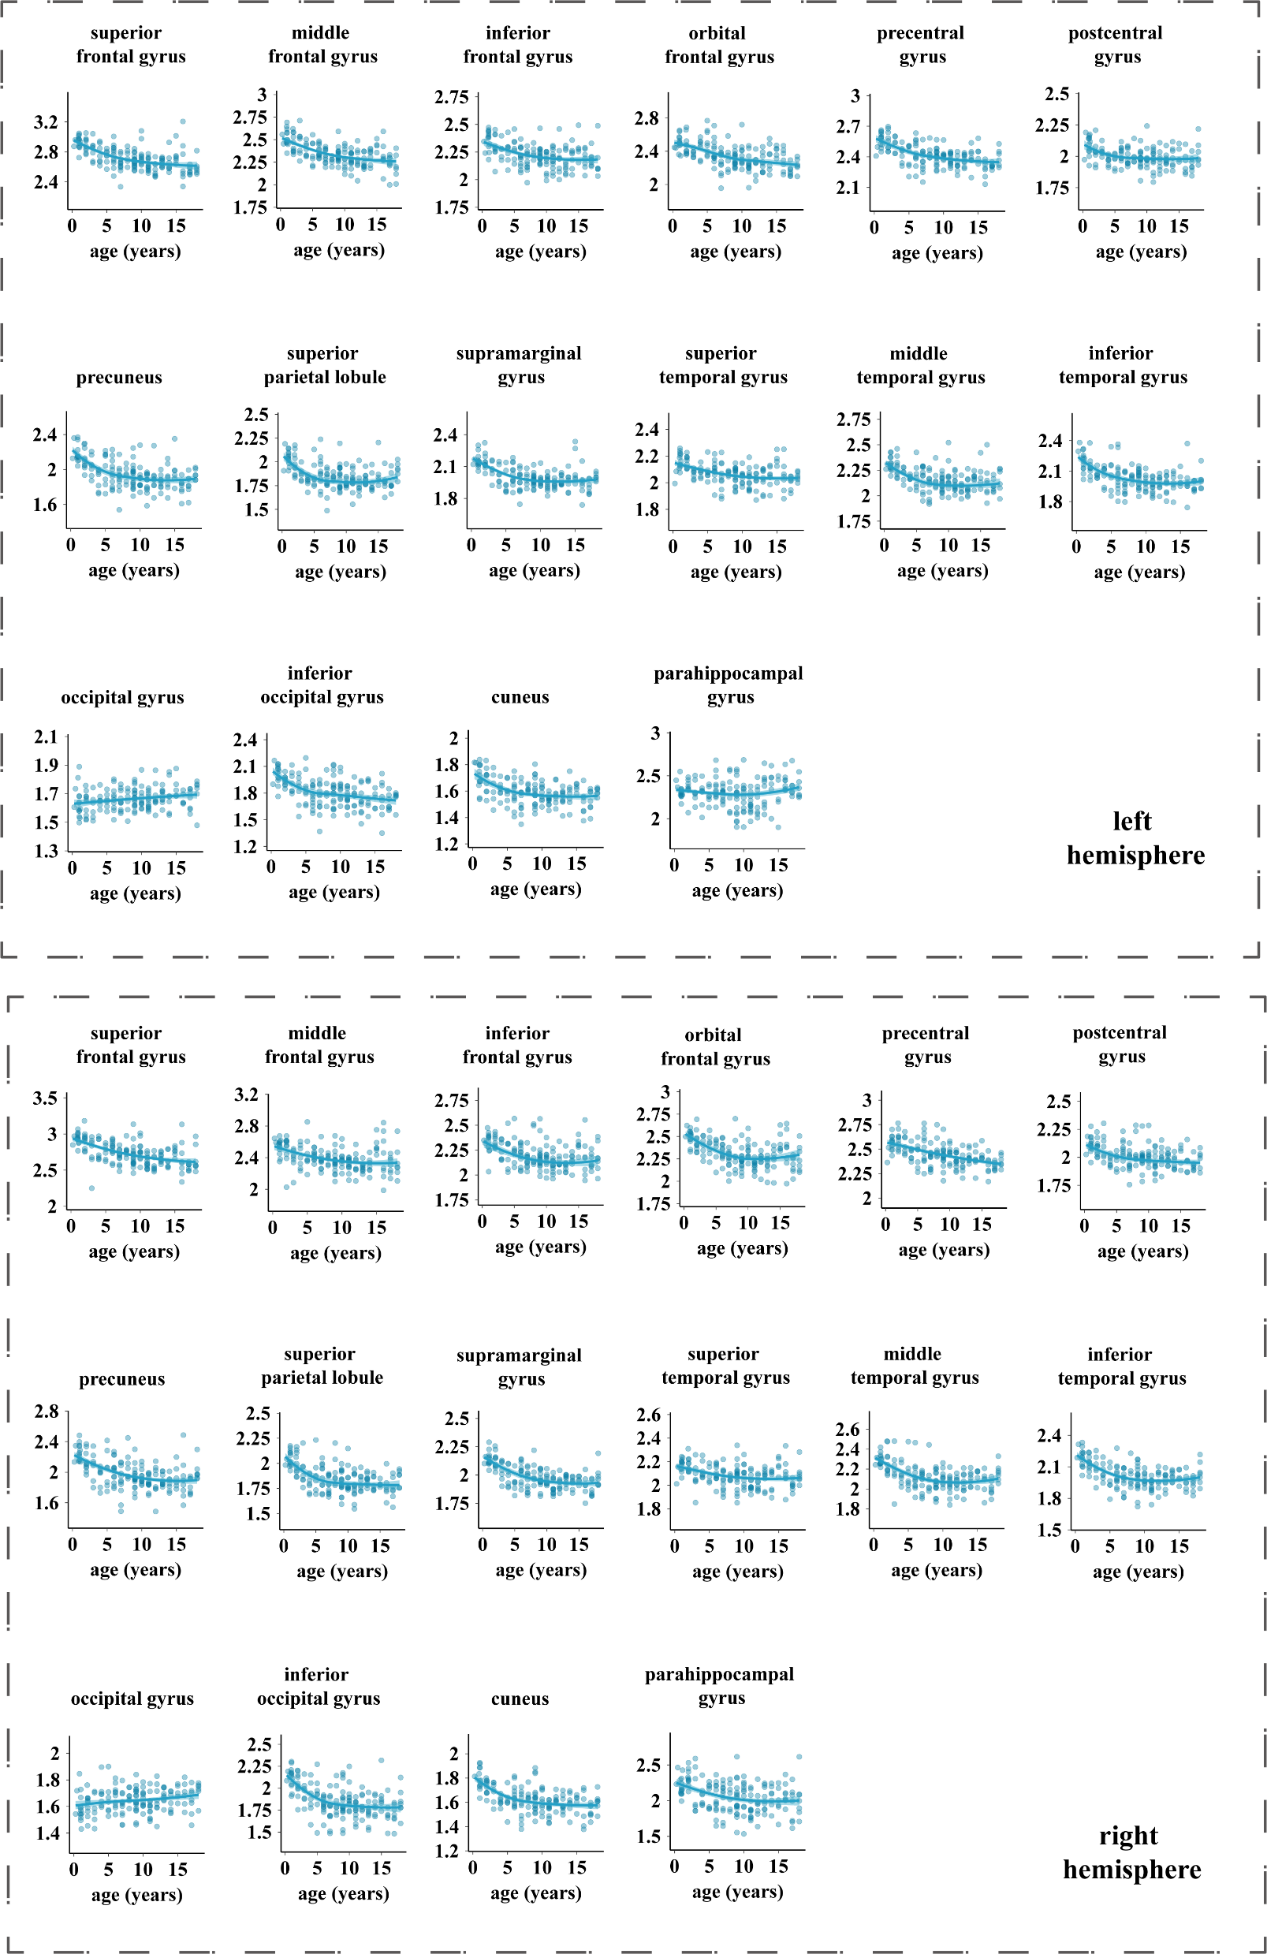
 **Figure S4.** Mapping the developmental and aging trajectories of cortical thickness across fine-grained cortical regions in macaques from 0 to 18 years of age.


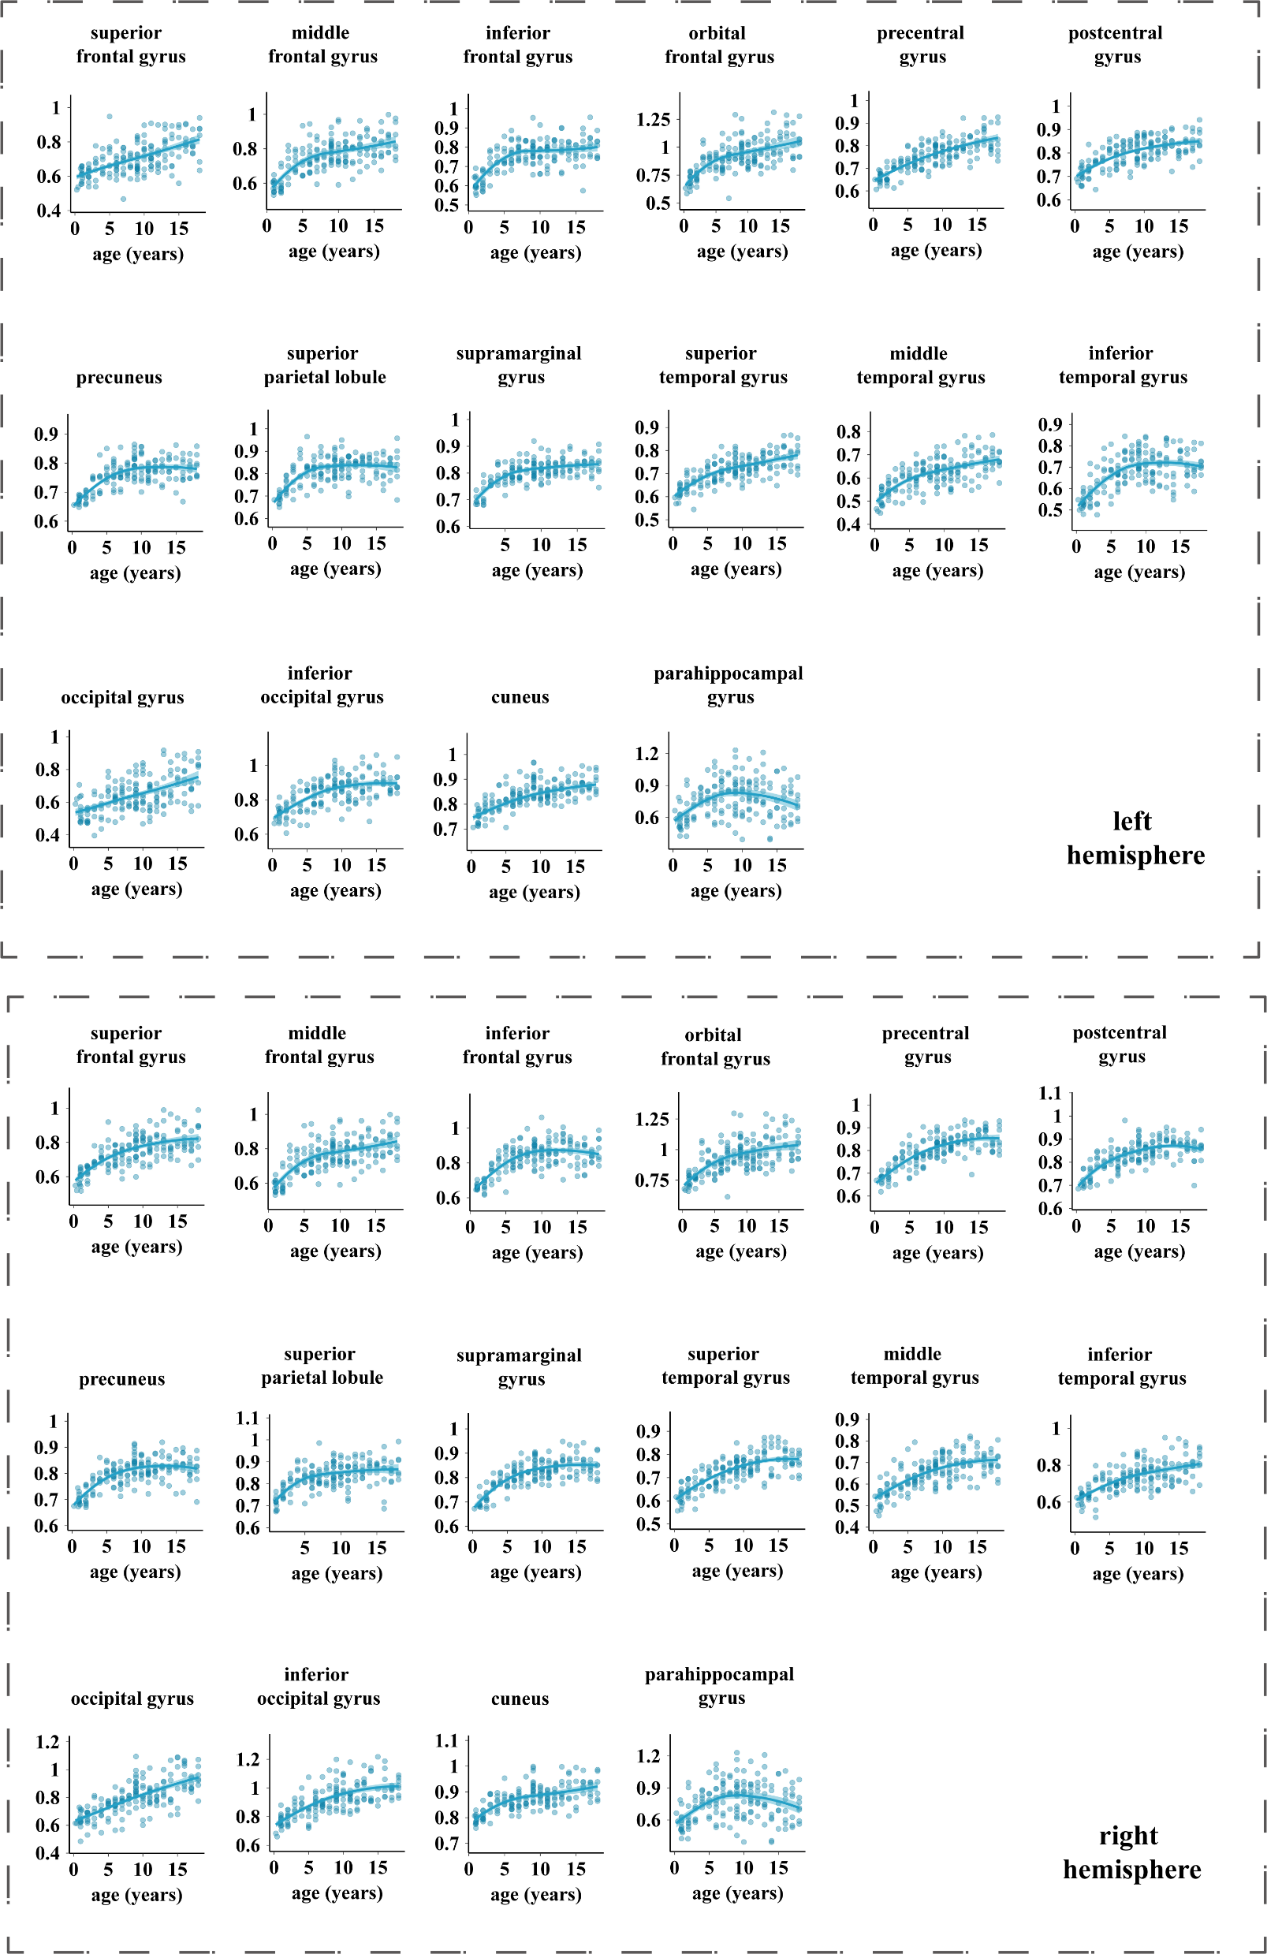


**Figure S5.** Mapping the developmental and aging trajectories of mean MK across fine-grained cortical regions in macaques from 0 to 18 years of age.


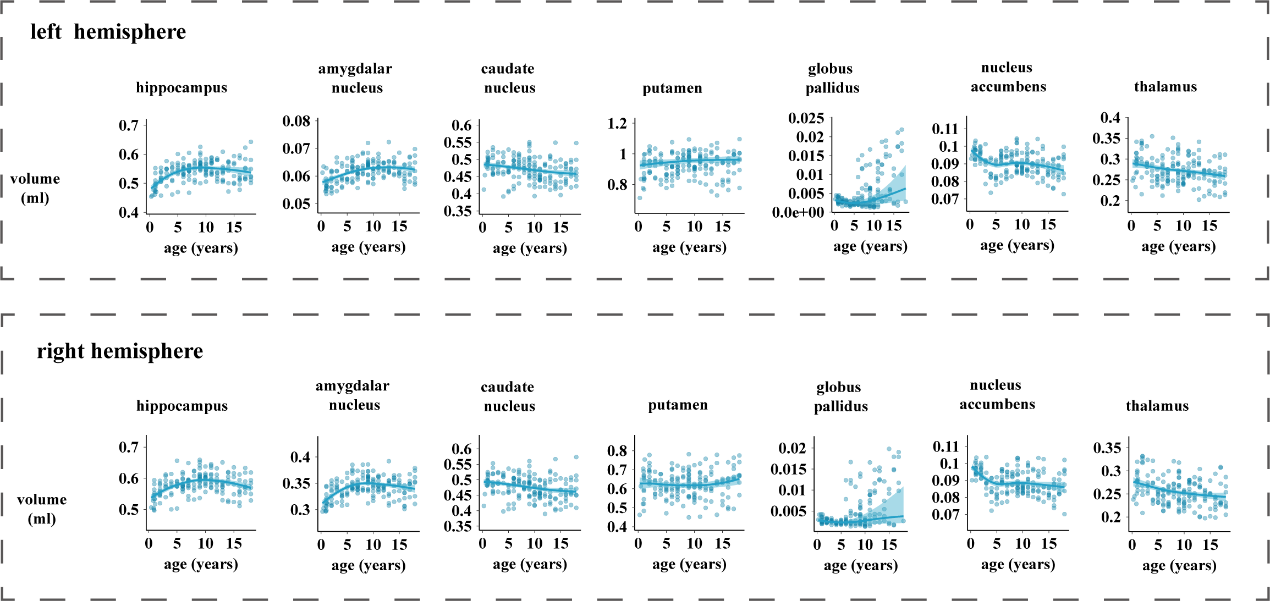


**Figure S6.** Mapping the developmental and aging trajectories of volume across fine-grained subcortex regions in macaques from 0 to 18 years of age.


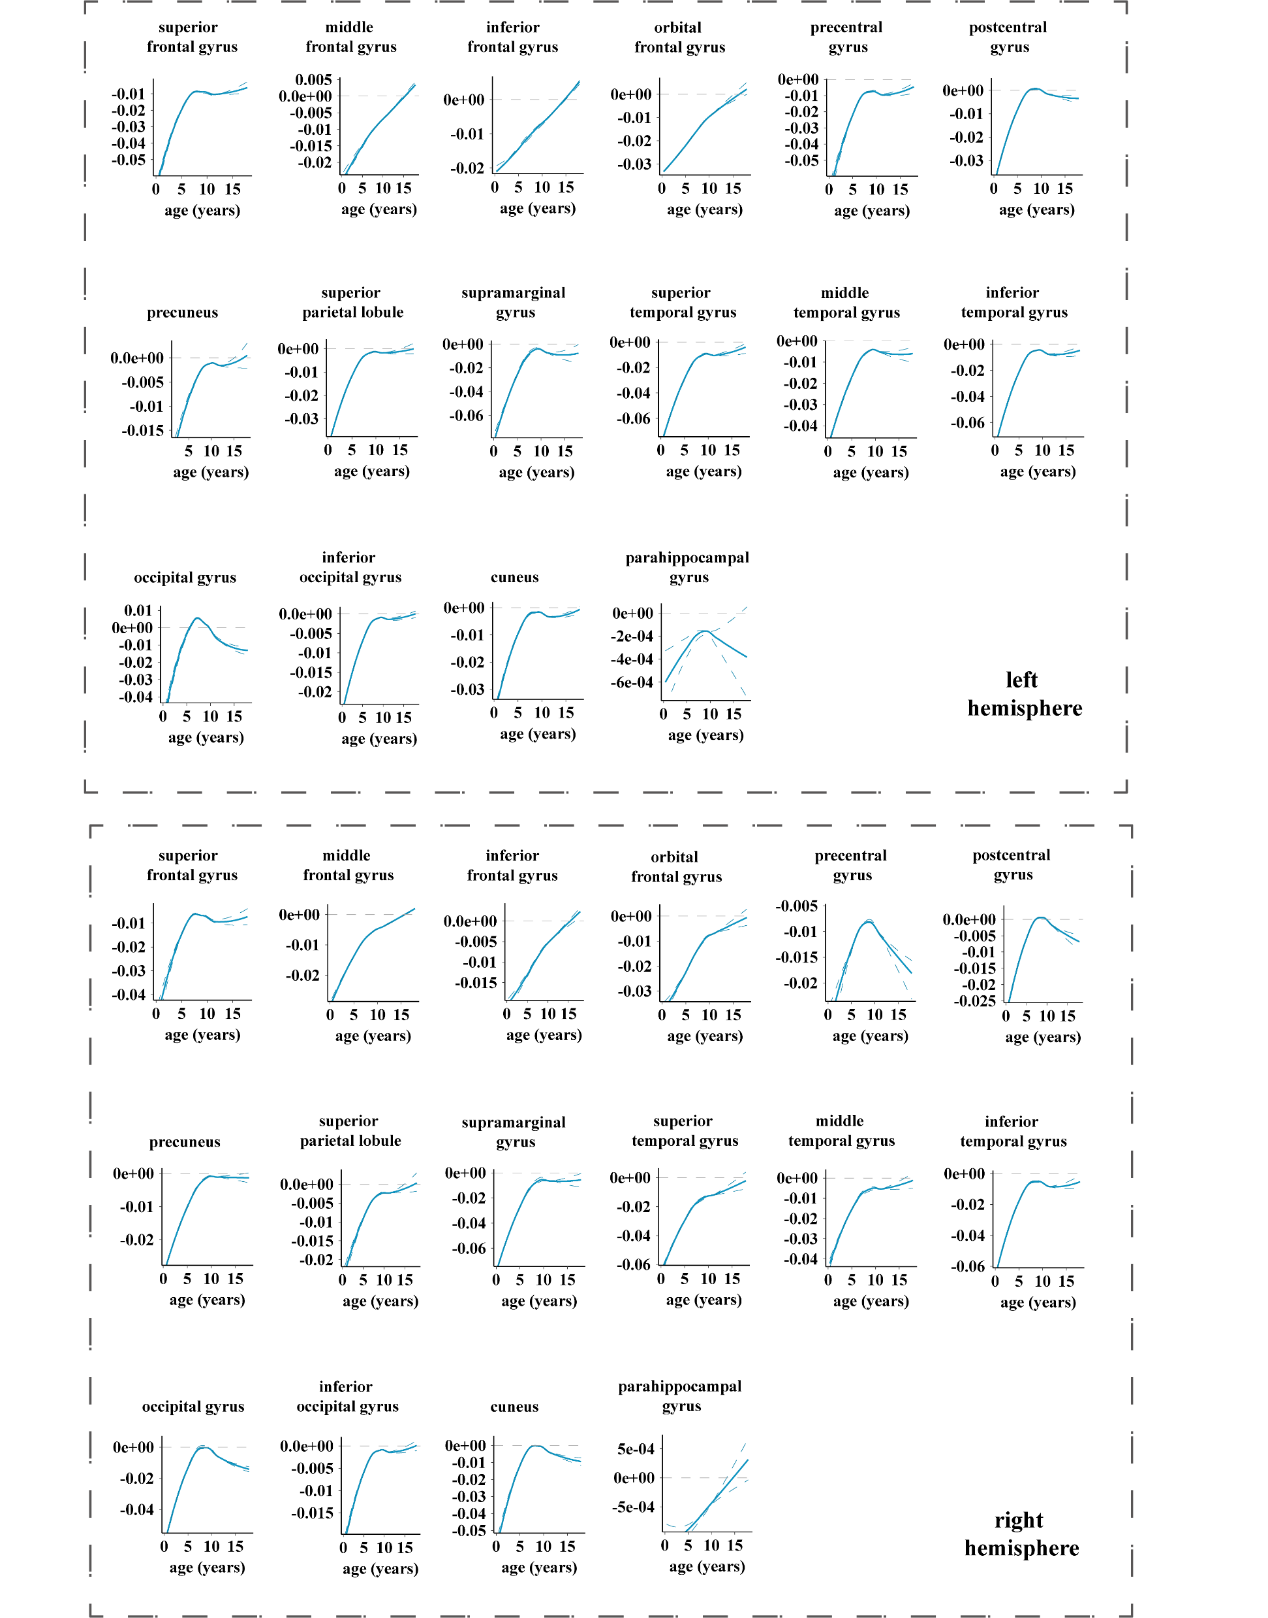


**Figure S7.** Mapping the developmental and aging rates of gray matter volume across fine-grained cortical regions in macaques from 0 to 18 years of age.


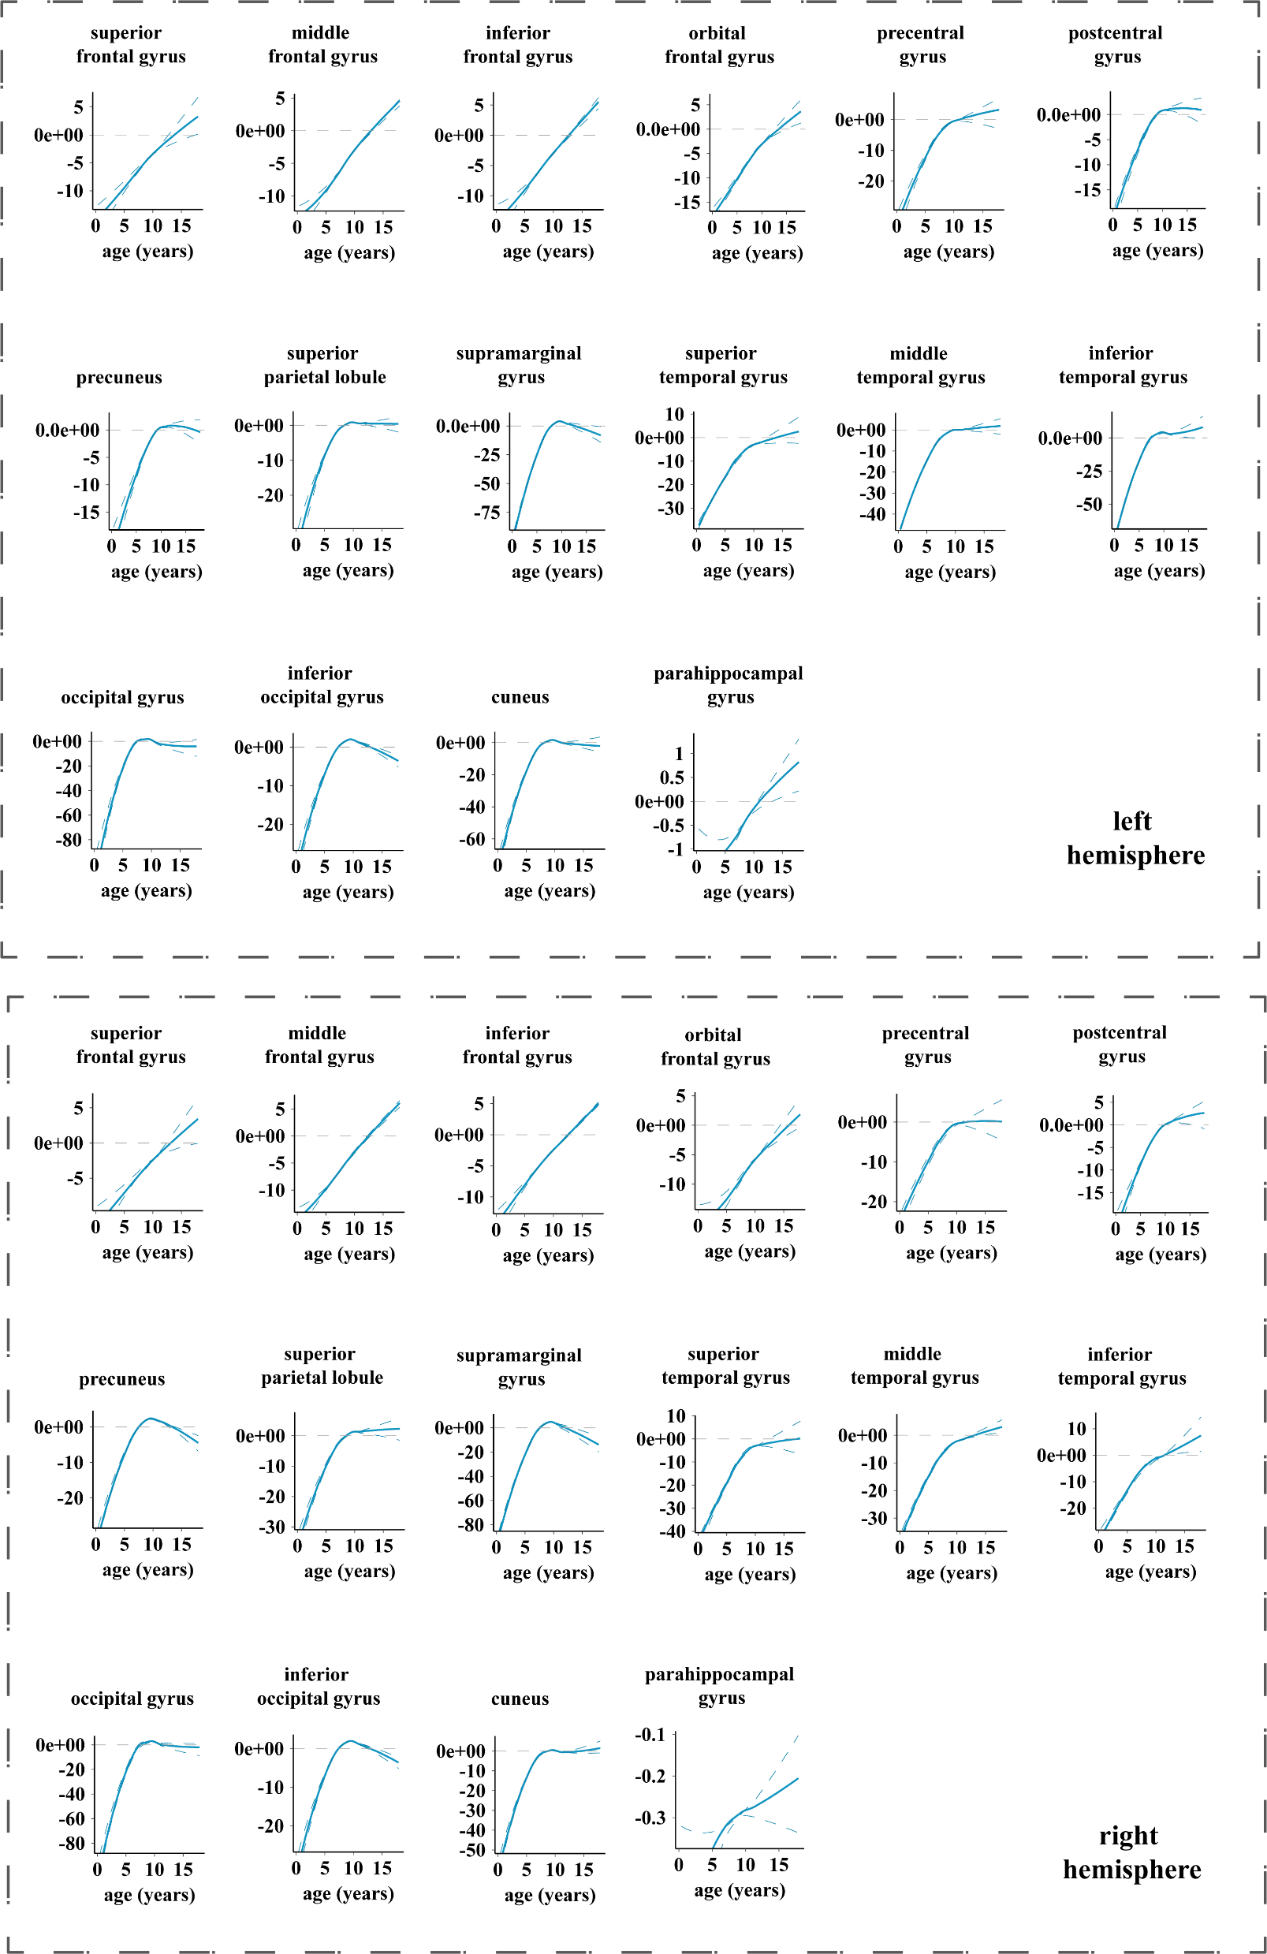


**Figure S8.** Mapping the developmental and aging rates of surface area across fine-grained cortical regions in macaques from 0 to 18 years of age.


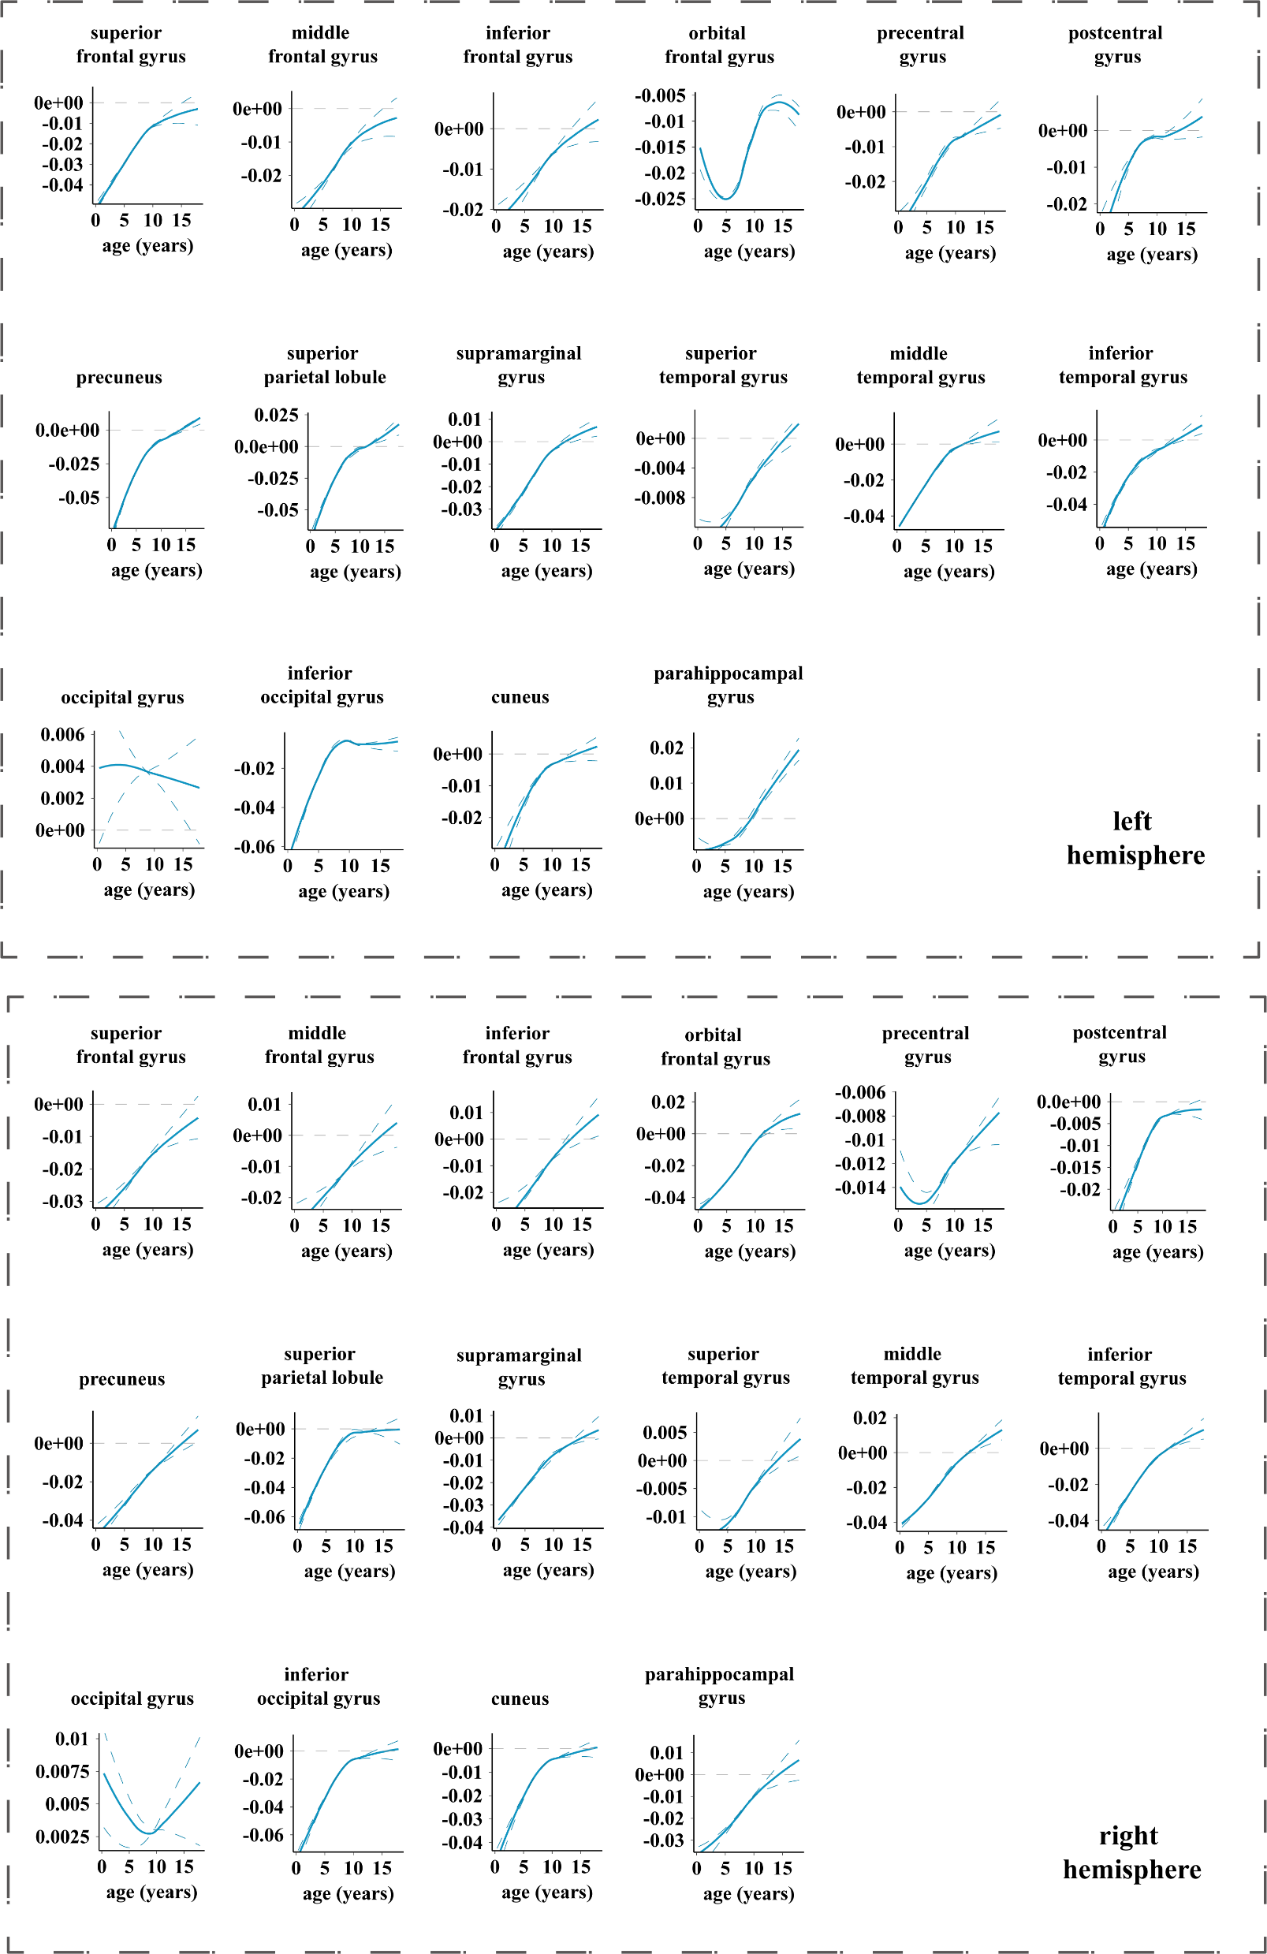


**Figure S9.** Mapping the developmental and aging rates of cortical thickness across fine-grained cortical regions in macaques from 0 to 18 years of age.


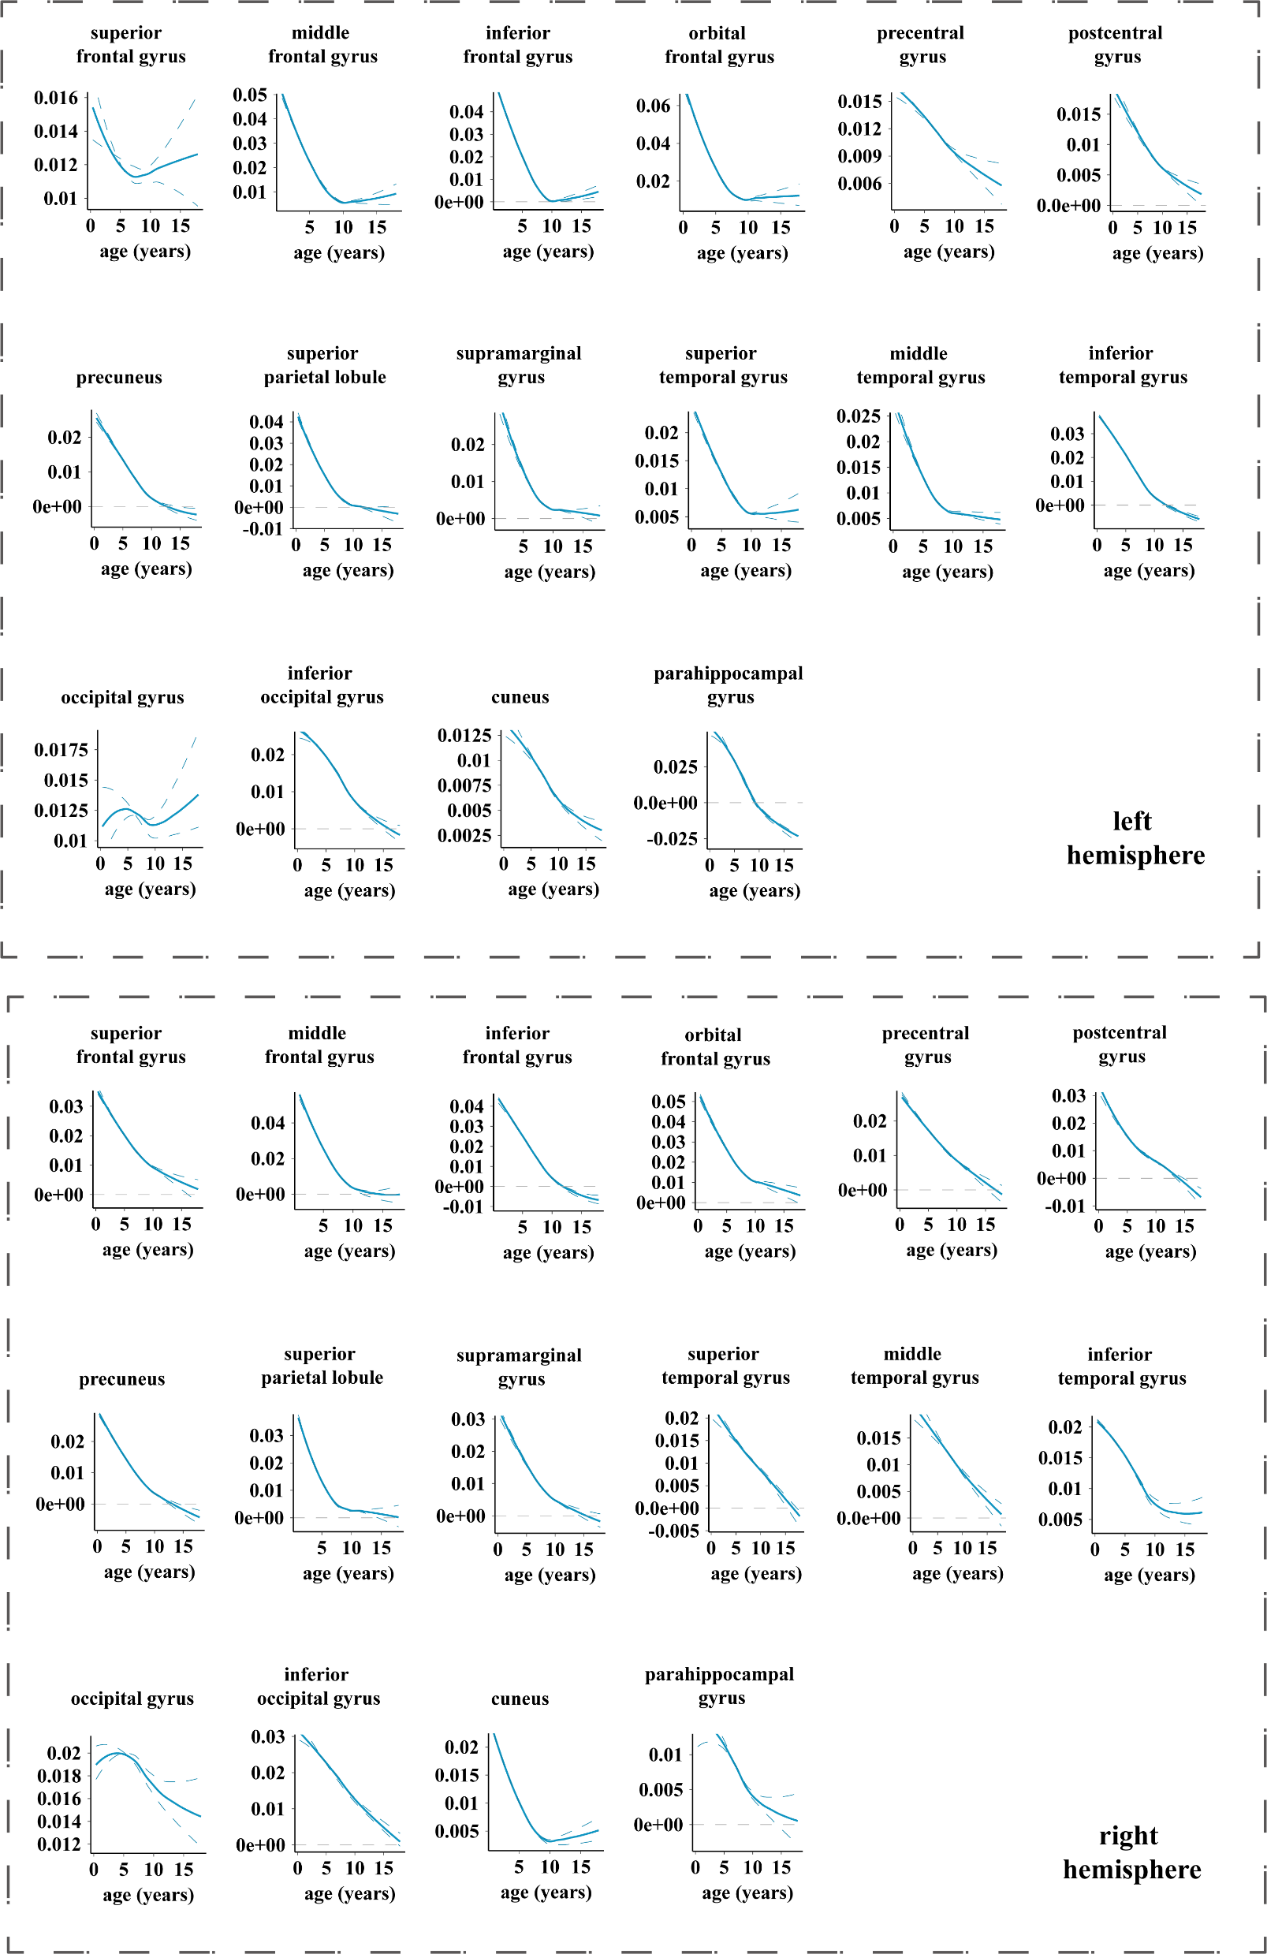


**Figure S10.** Mapping the developmental and aging trajectories of mean MK across fine-grained cortical regions in macaques from 0 to 18 years of age.


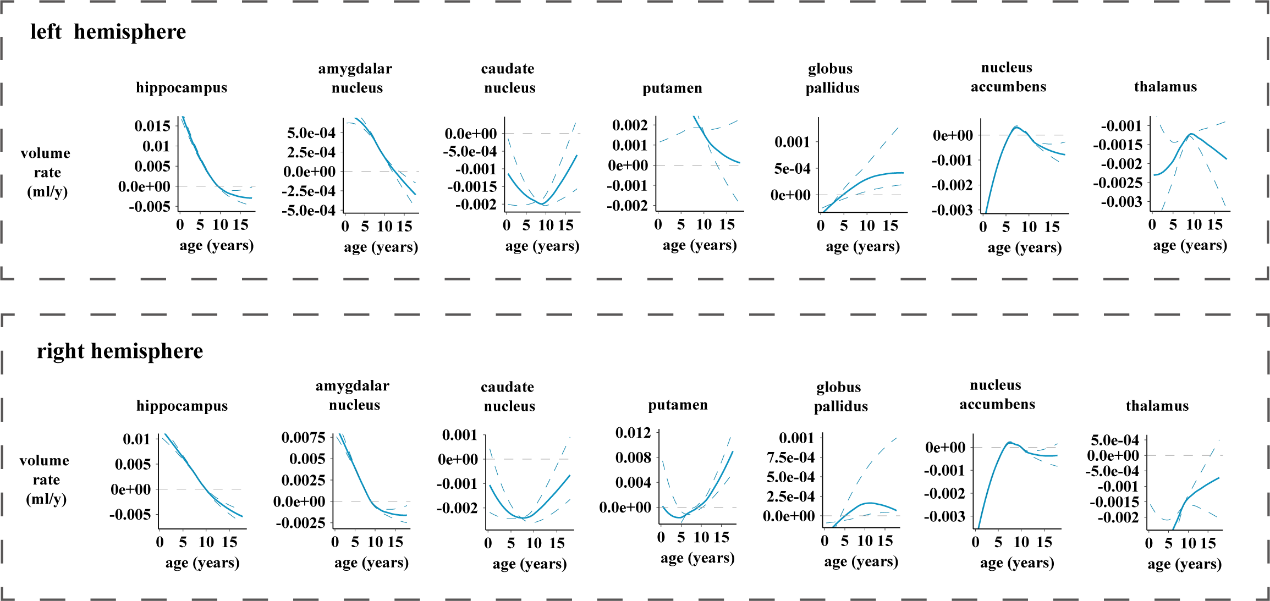


**Figure S11.** Mapping the developmental and aging rates of volume across fine-grained subcortex regions in macaques from 0 to 18 years of age.


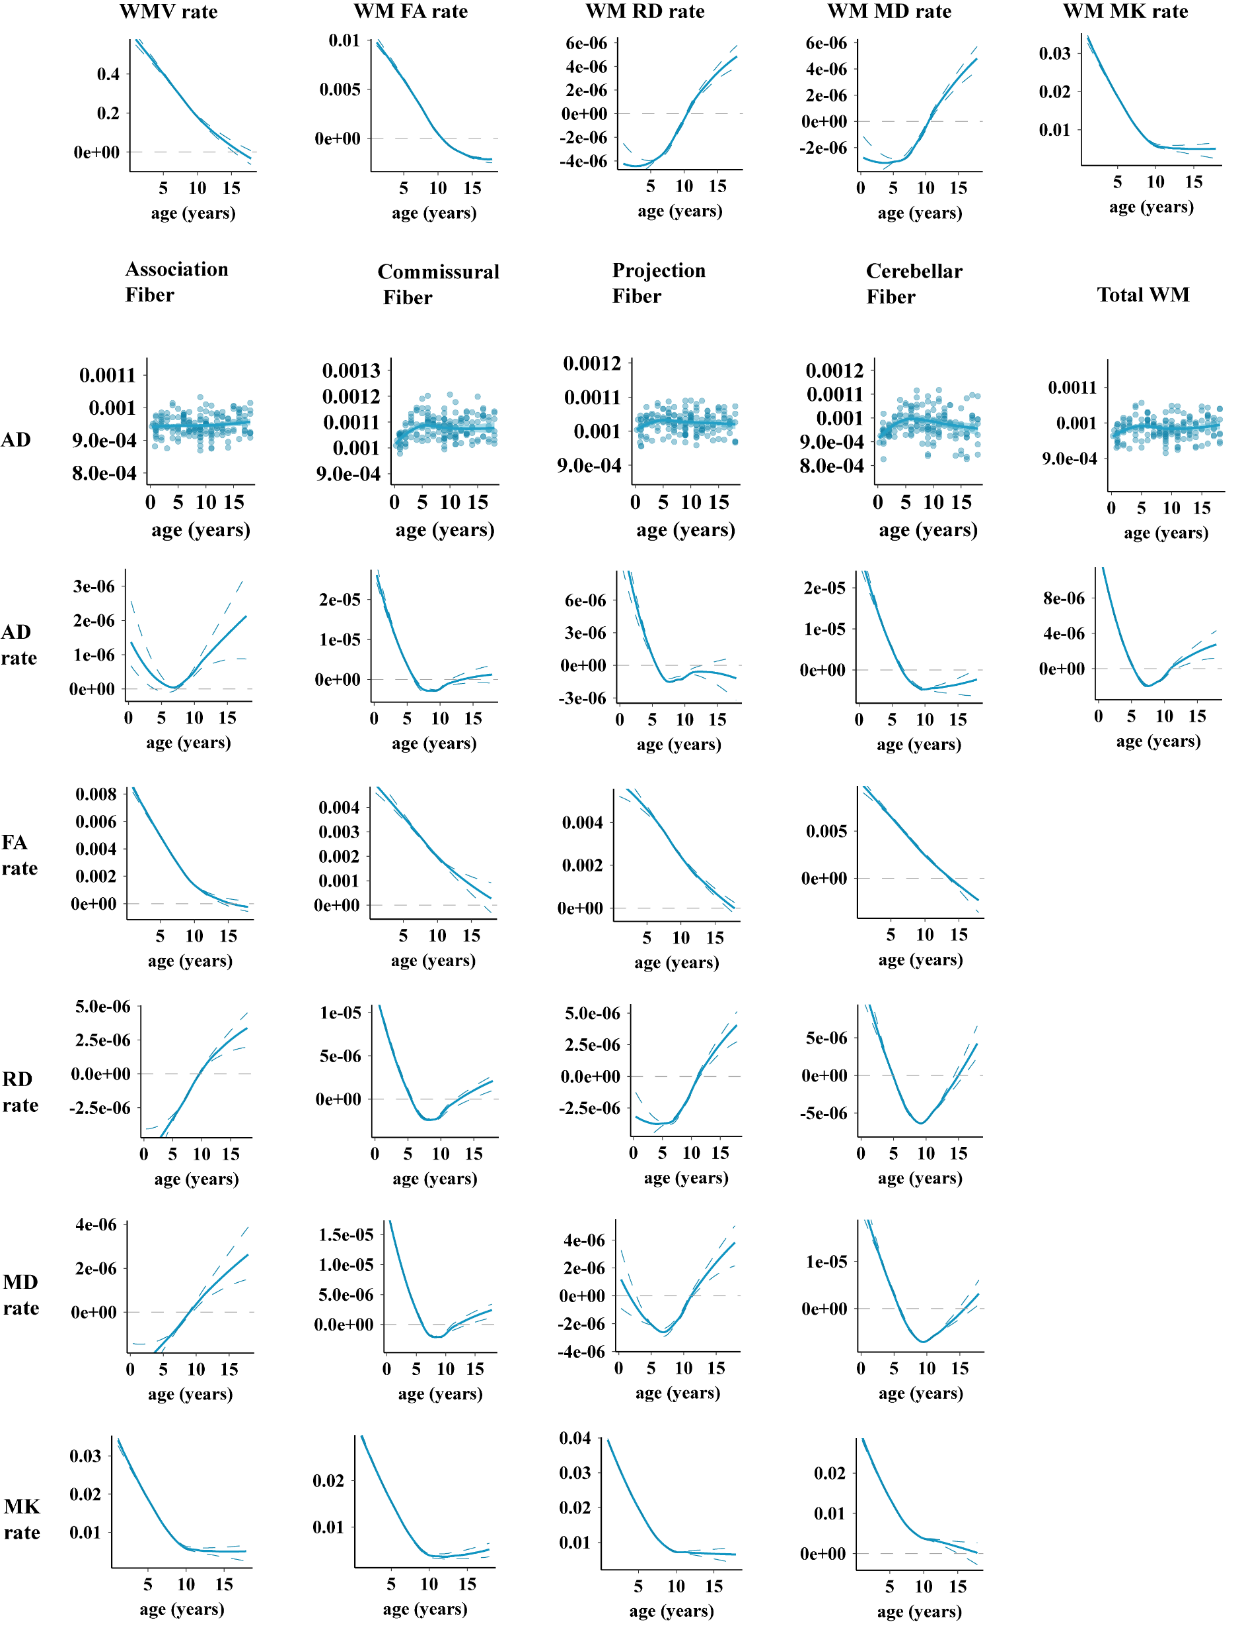


**Figure S12.** Developmental trajectories of global and group white matter structural indices in macaques from 0 to 18 years old. This figure illustrates the age-related rate of change in global white matter structural indices across the macaque brain, as well as the developmental trajectories of FA, MD, RD, AD and MK.


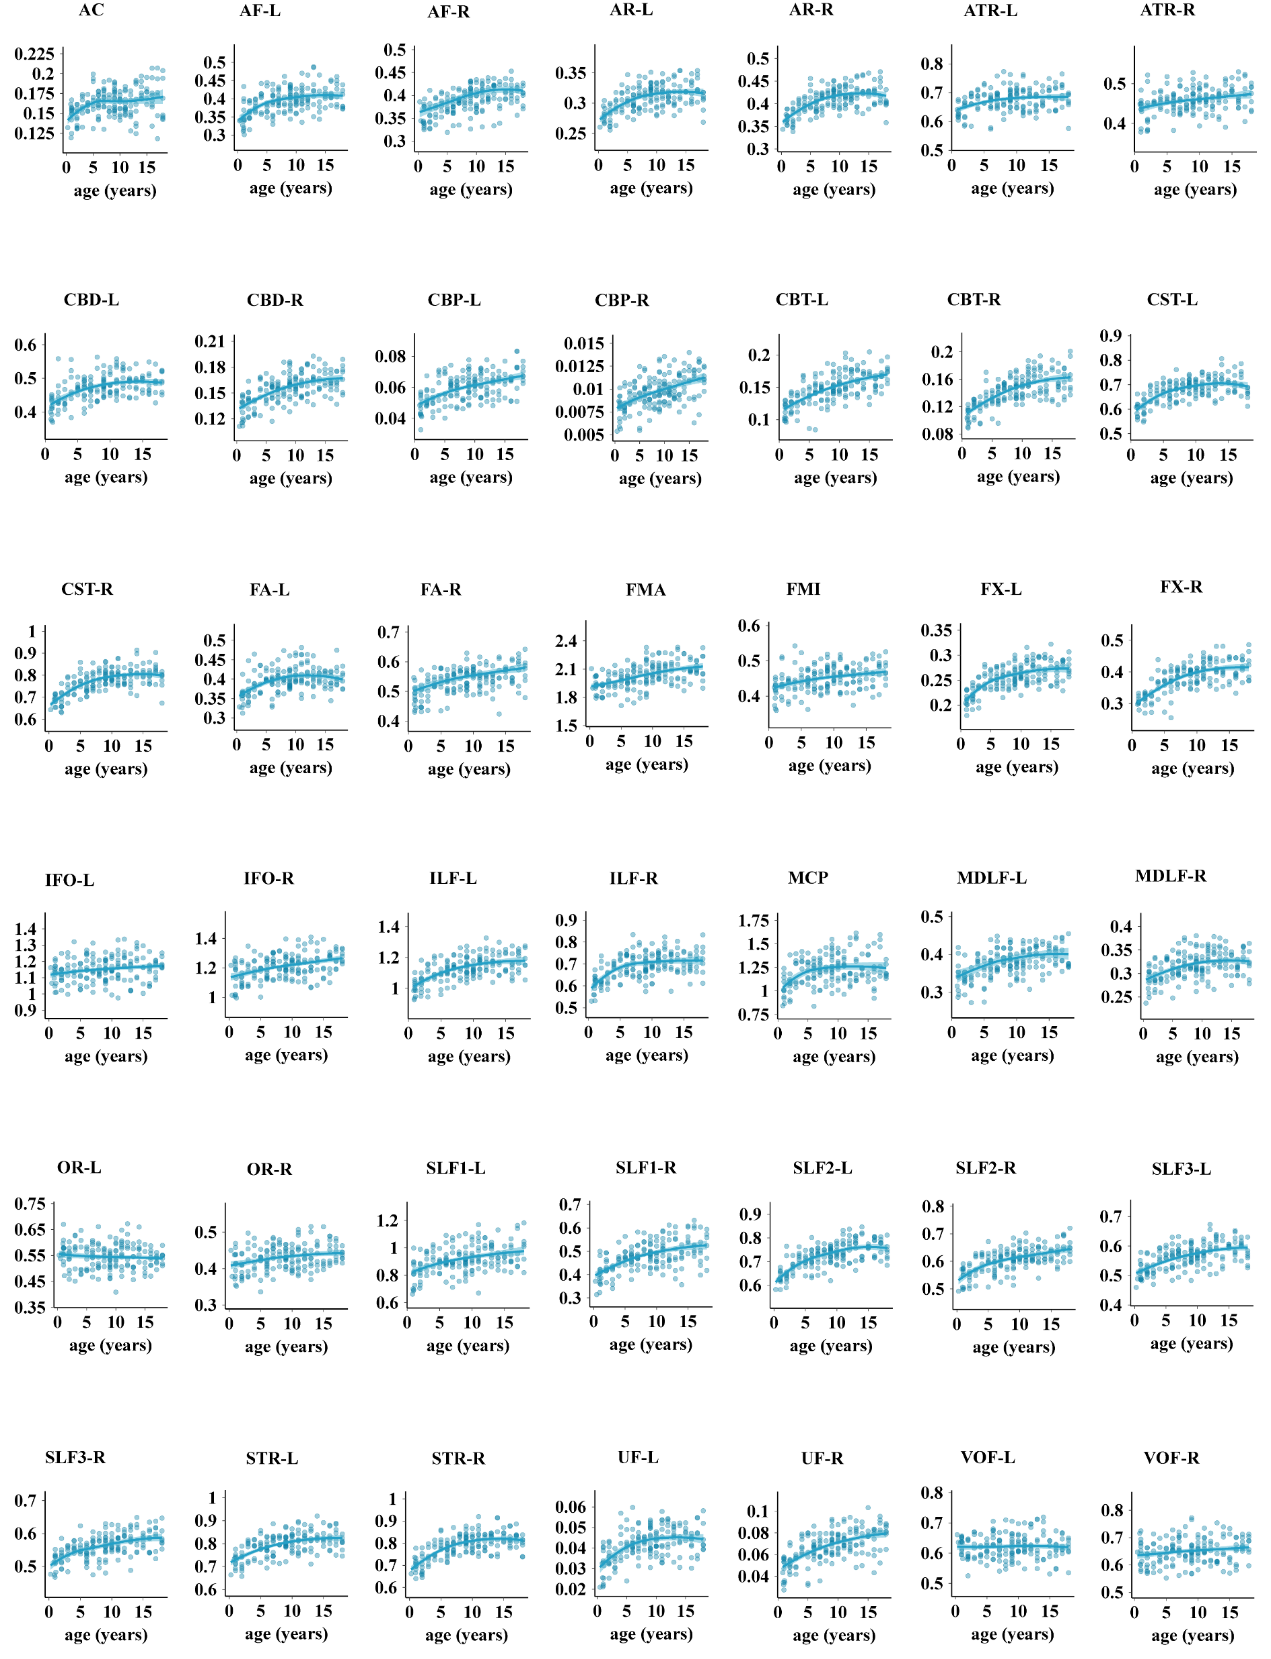


**Figure S13.** Mapping the developmental and aging trajectories of volume(cm3) across white matter fibers in macaques from 0 to 18 years of age, segmented according to the X-TRACT atlas.


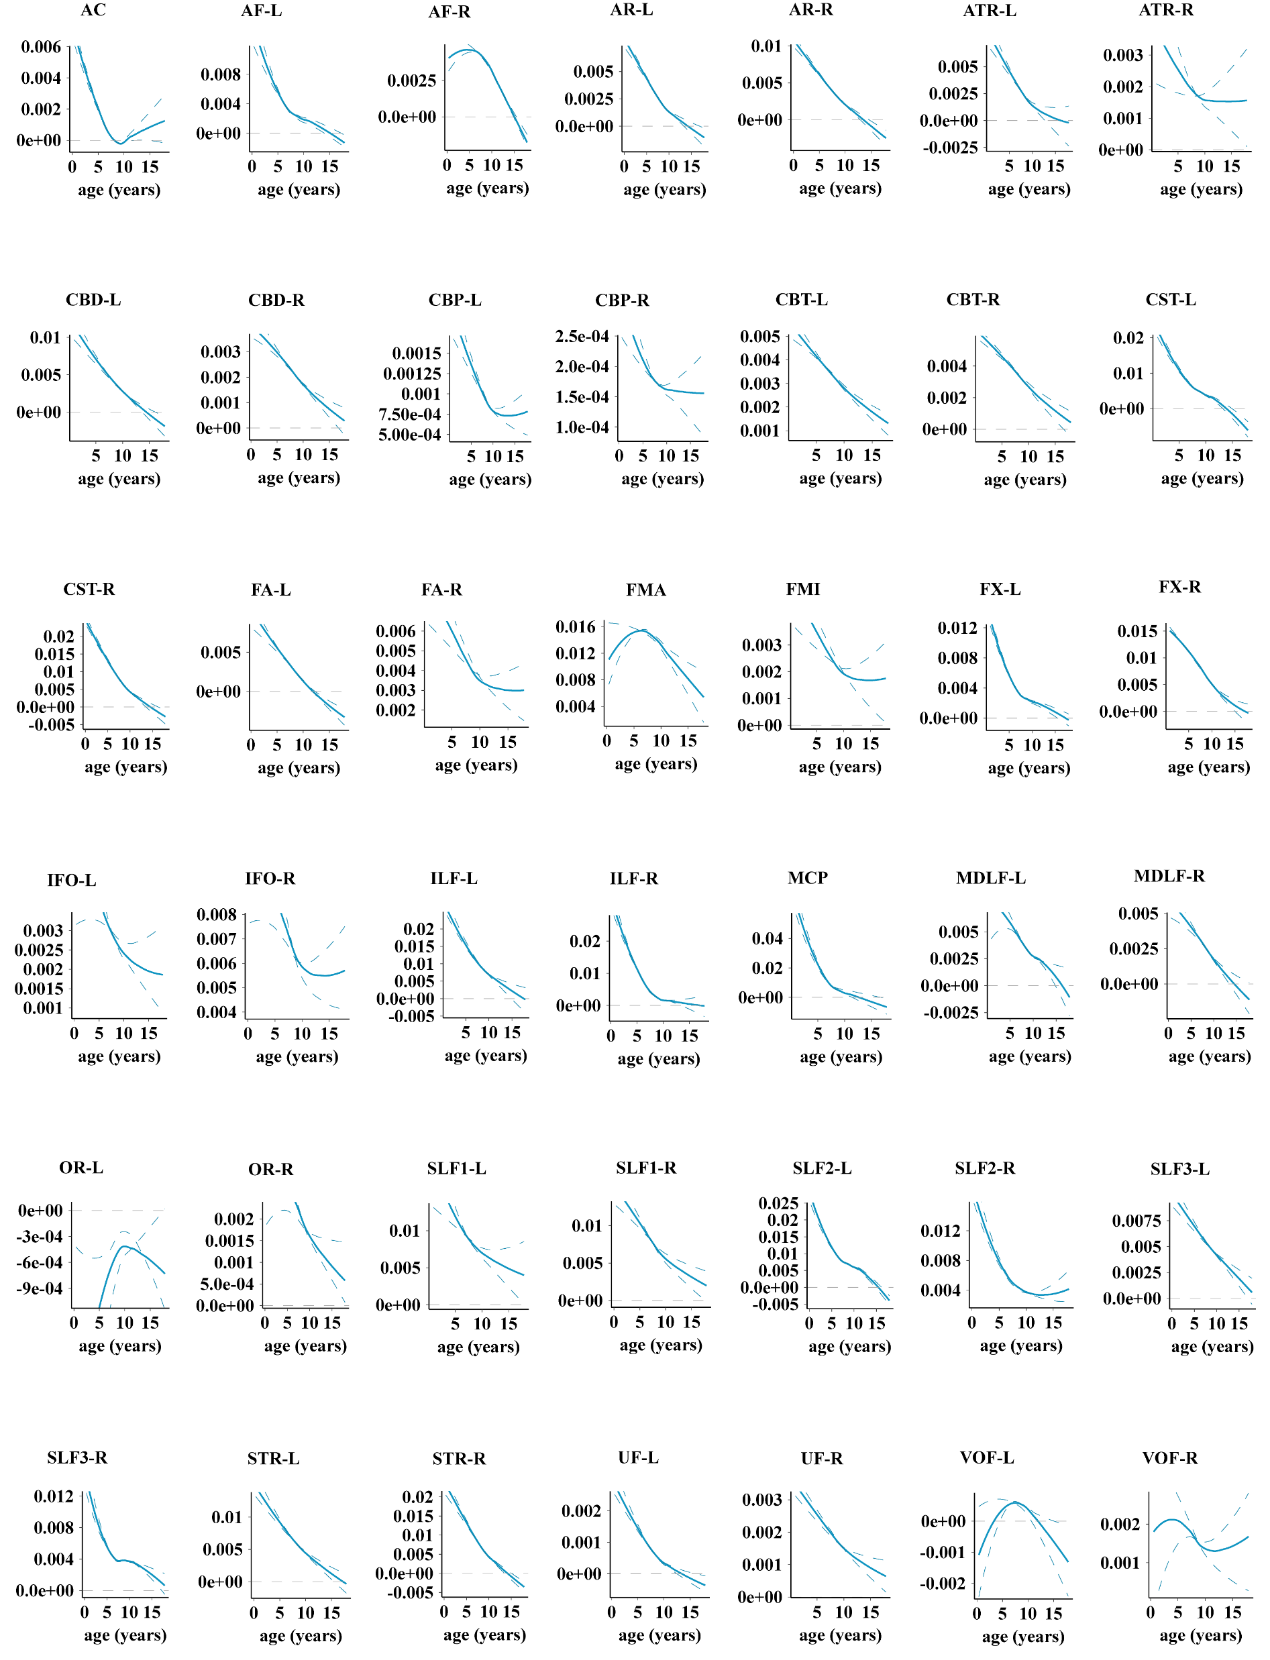


**Figure S14.** Mapping the developmental and aging rates of volume across white matter fibers in macaques from 0 to 18 years of age, segmented according to the X-TRACT atlas.


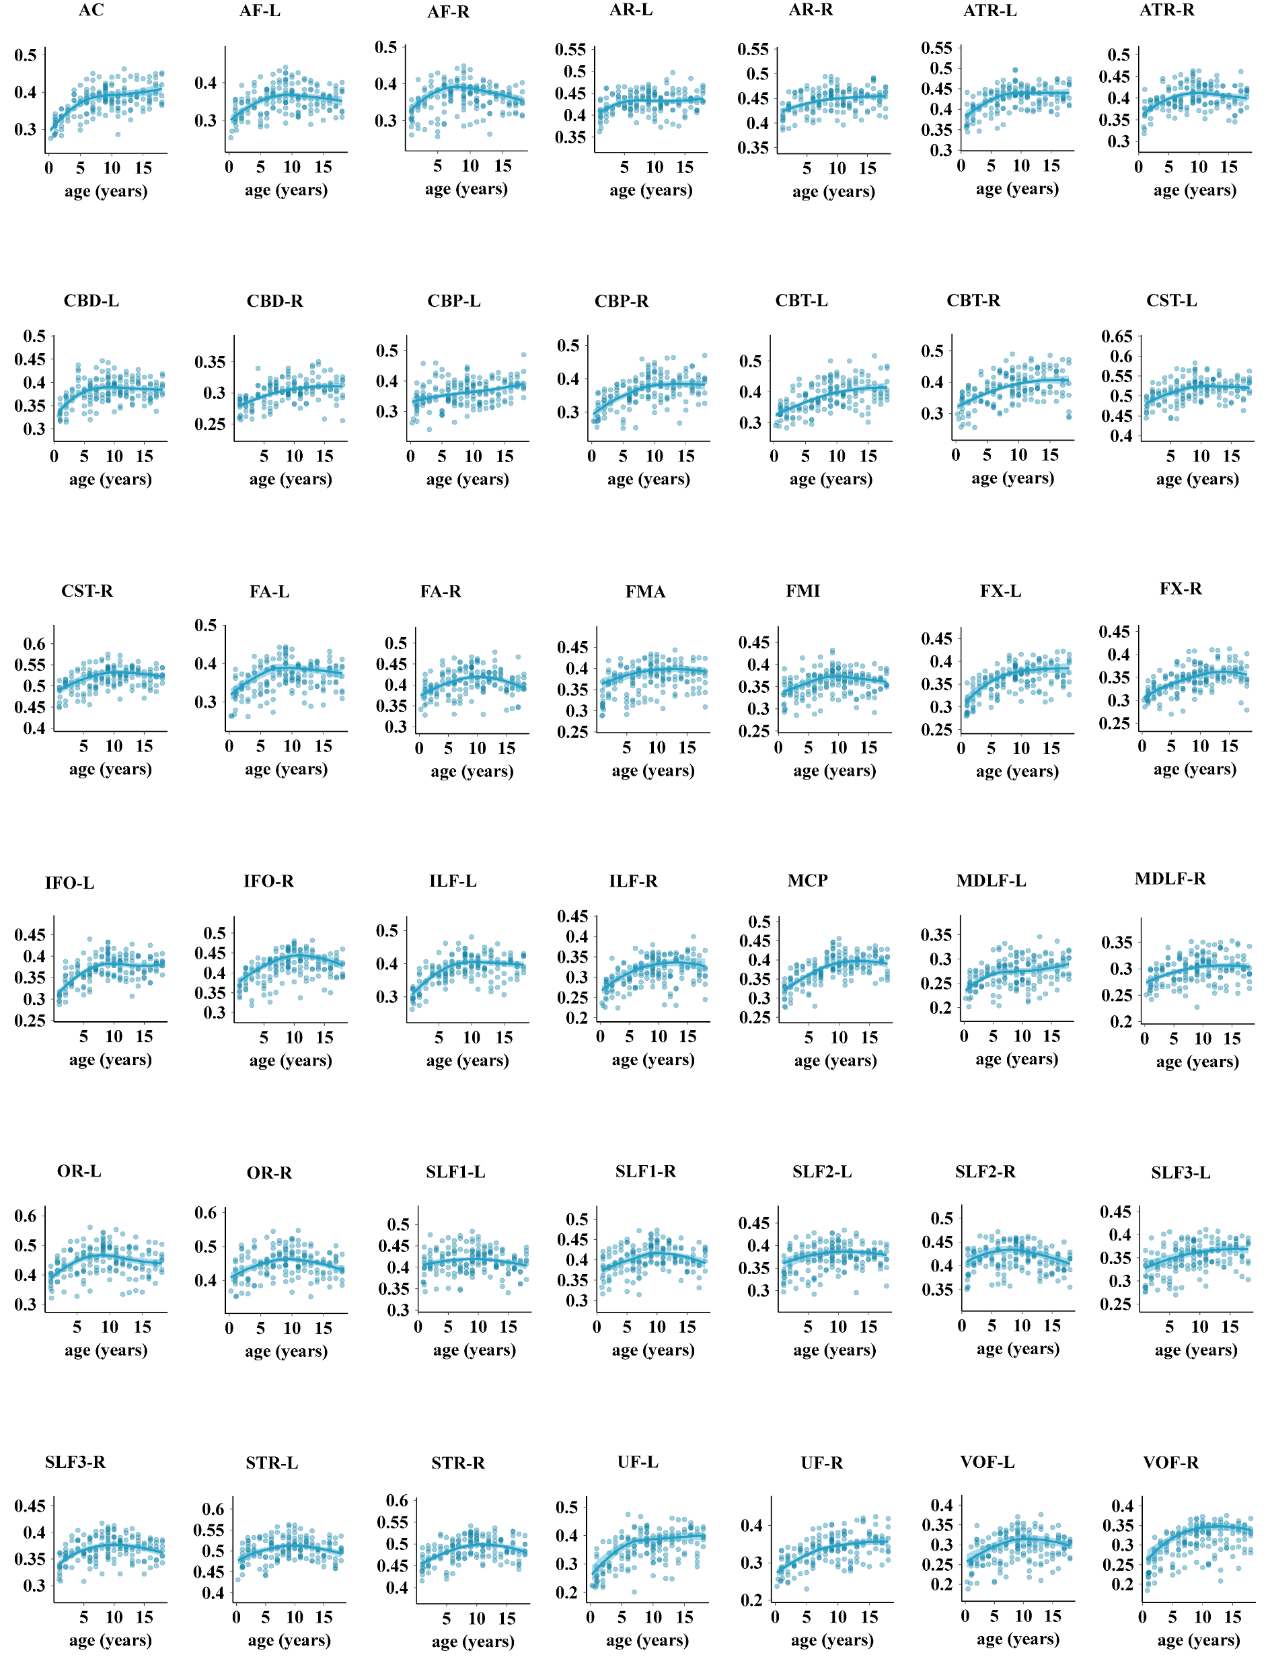


**Figure S15.** Mapping the developmental and aging trajectories of mean FA across white matter fibers in macaques from 0 to 18 years of age, segmented according to the X-TRACT atlas.


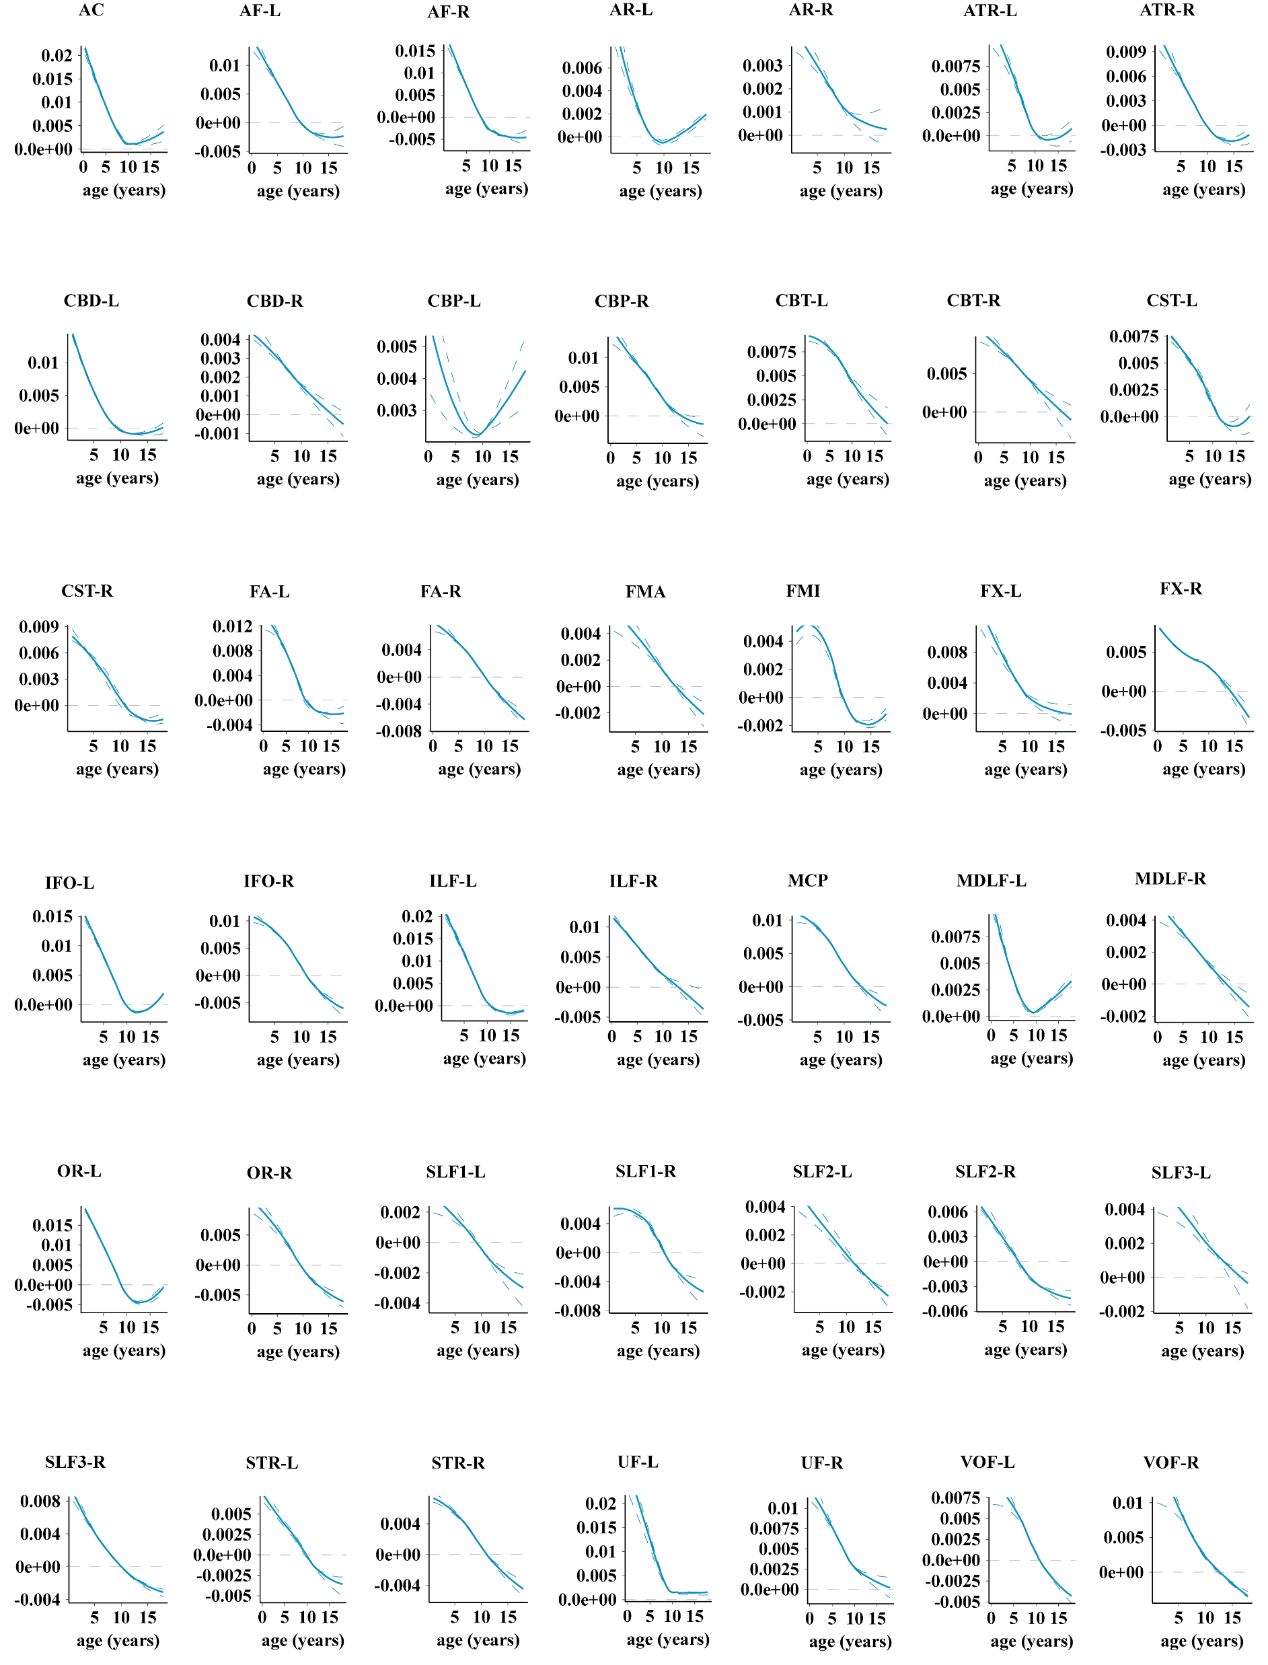


**Figure S16.** Mapping the developmental and aging rates of mean FA across white matter fibers in macaques from 0 to 18 years of age, segmented according to the X-TRACT atlas.


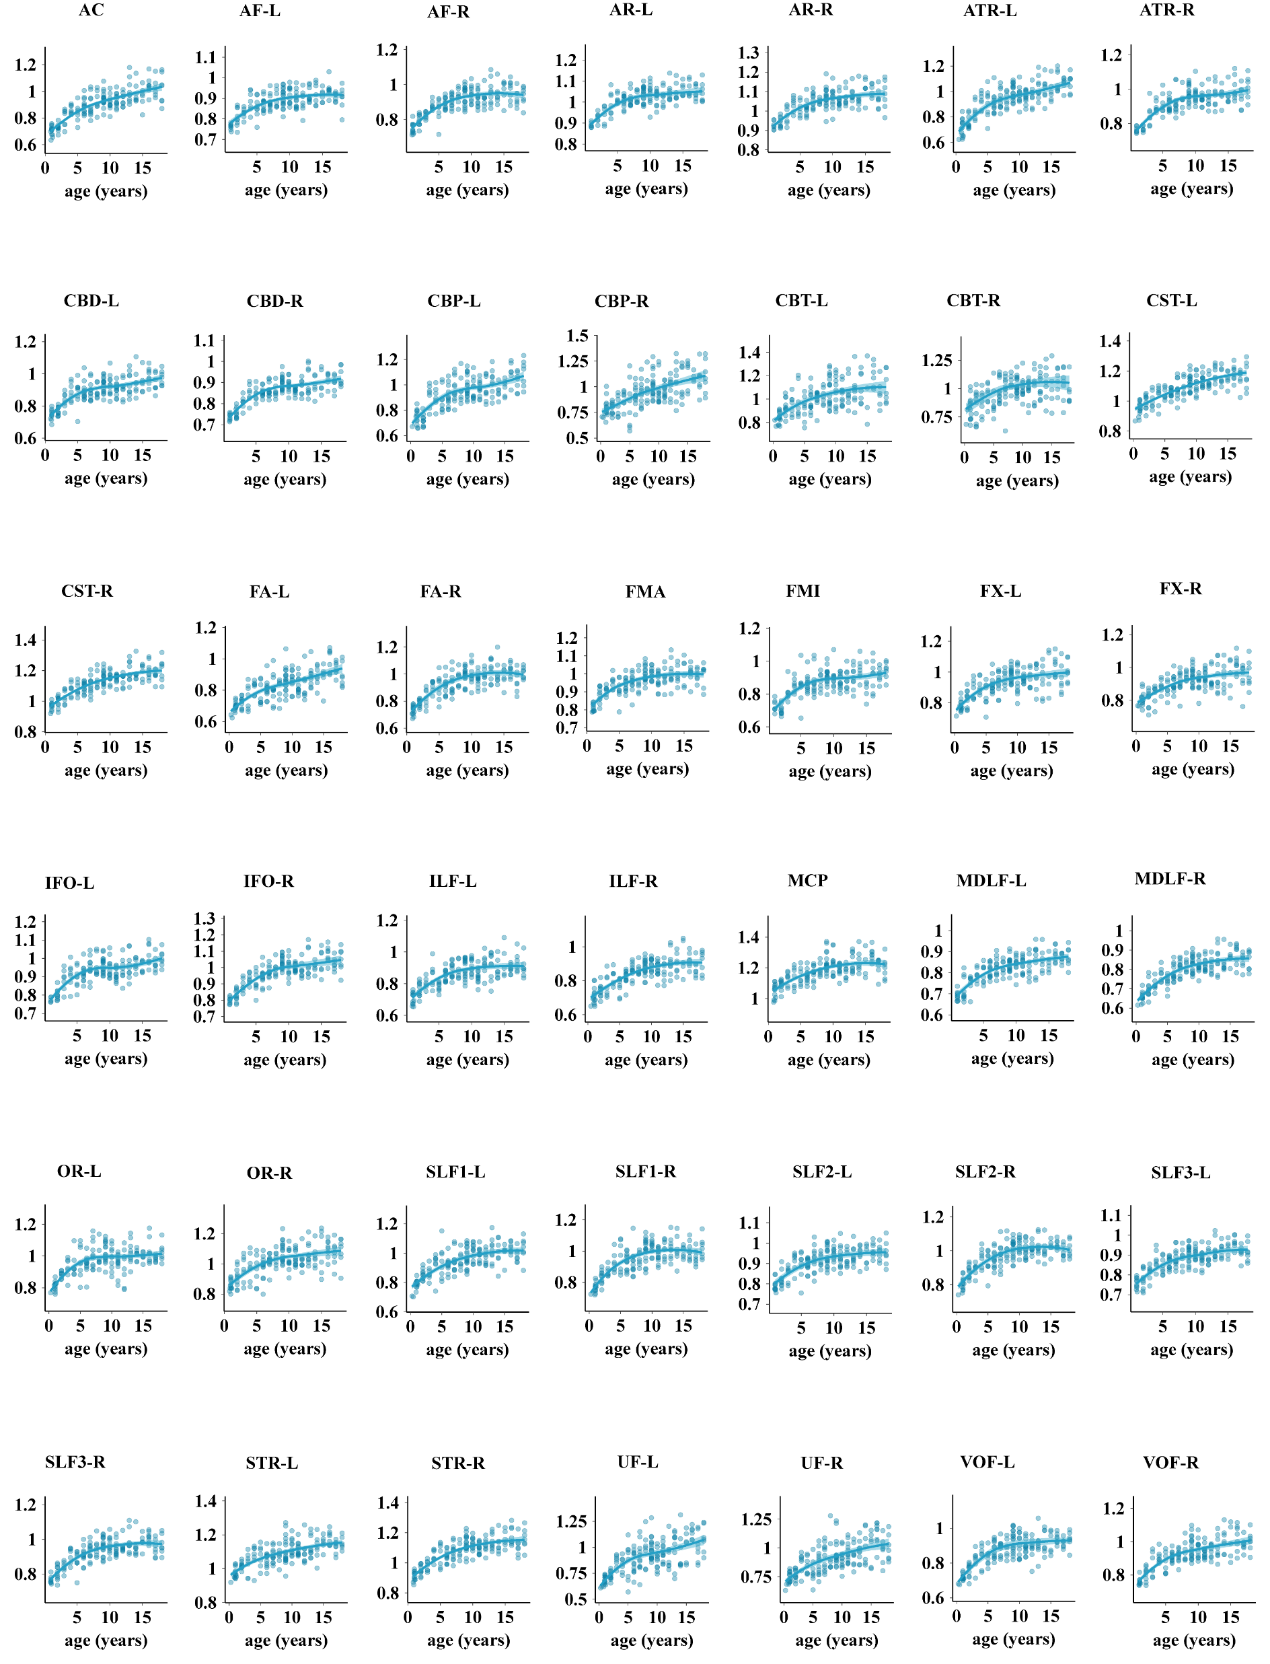


**Figure S17.** Mapping the developmental and aging trajectories of mean MK across white matter fibers in macaques from 0 to 18 years of age, segmented according to the X-TRACT atlas.


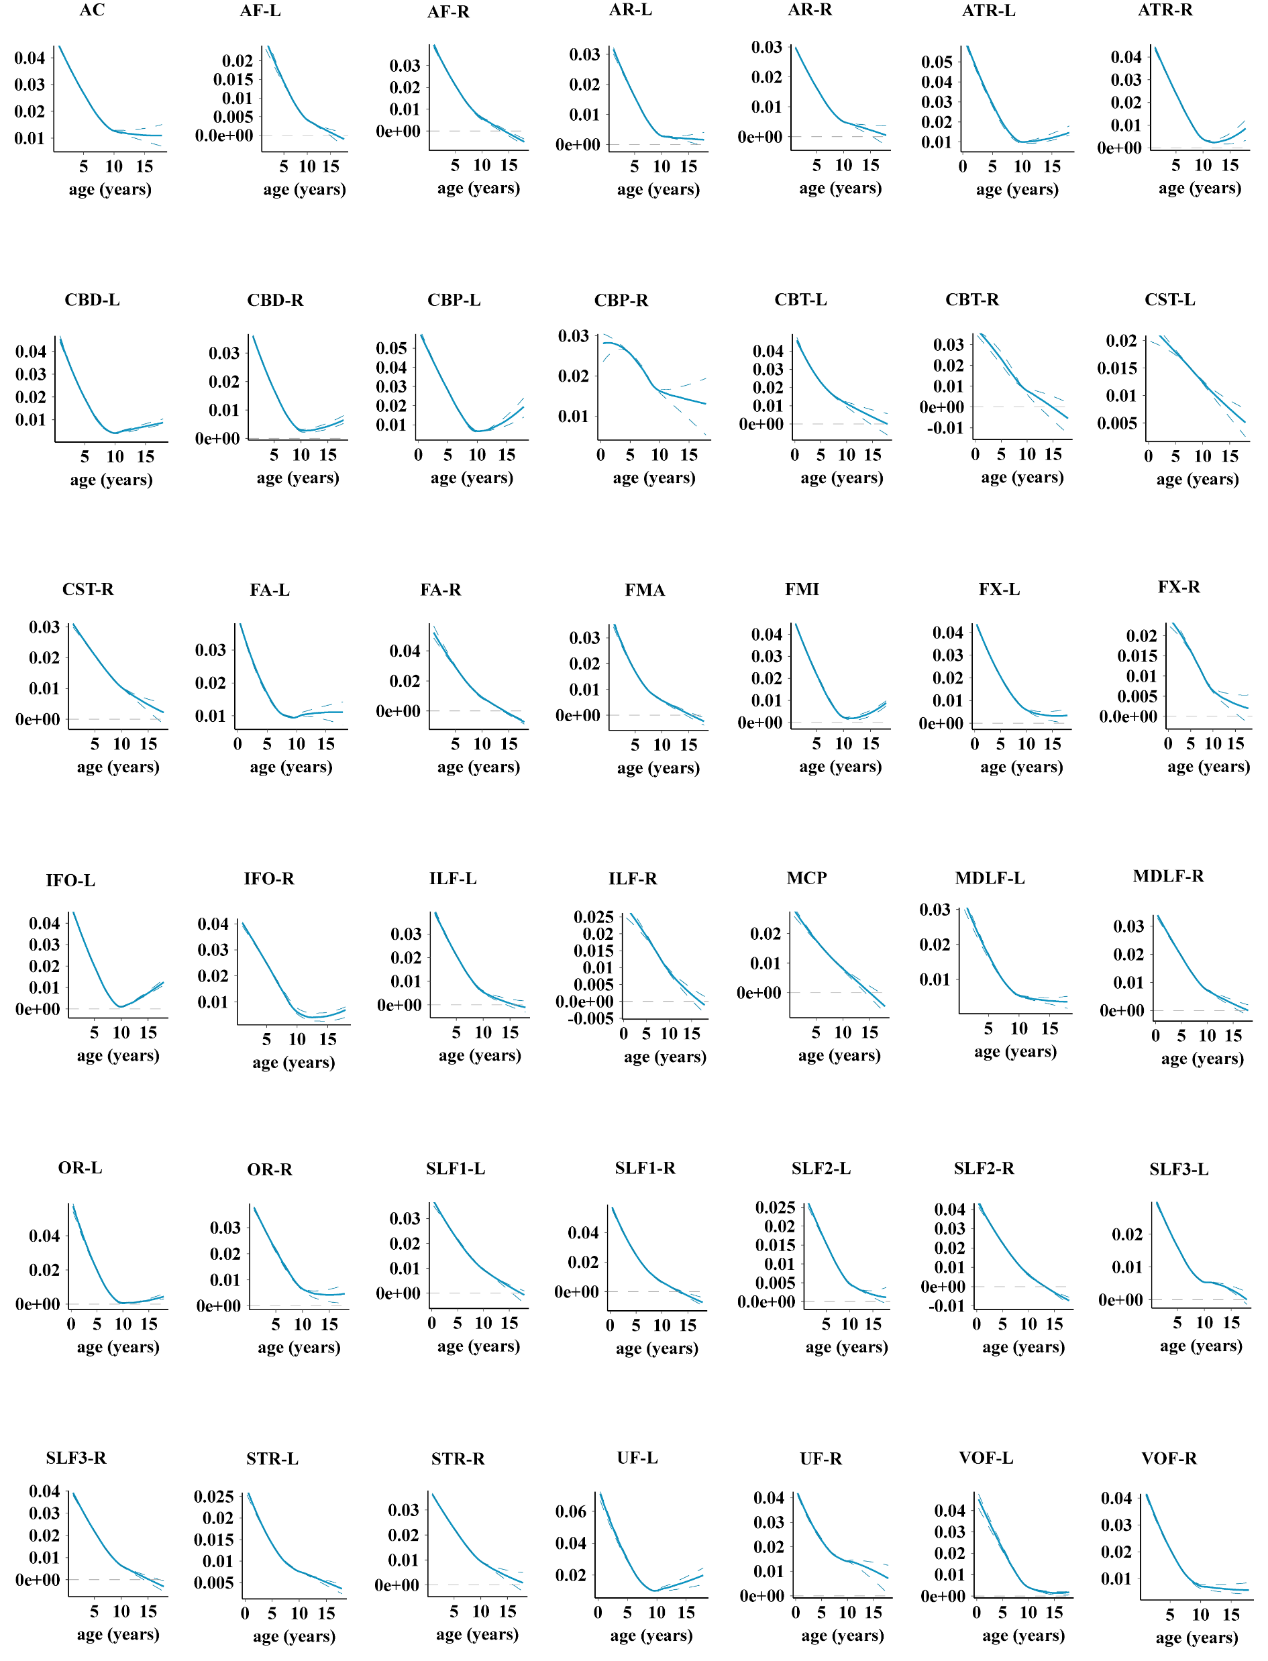


**Figure S18.** Mapping the developmental and aging rates of mean MK across white matter fibers in macaques from 0 to 18 years of age, segmented according to the X-TRACT atlas.


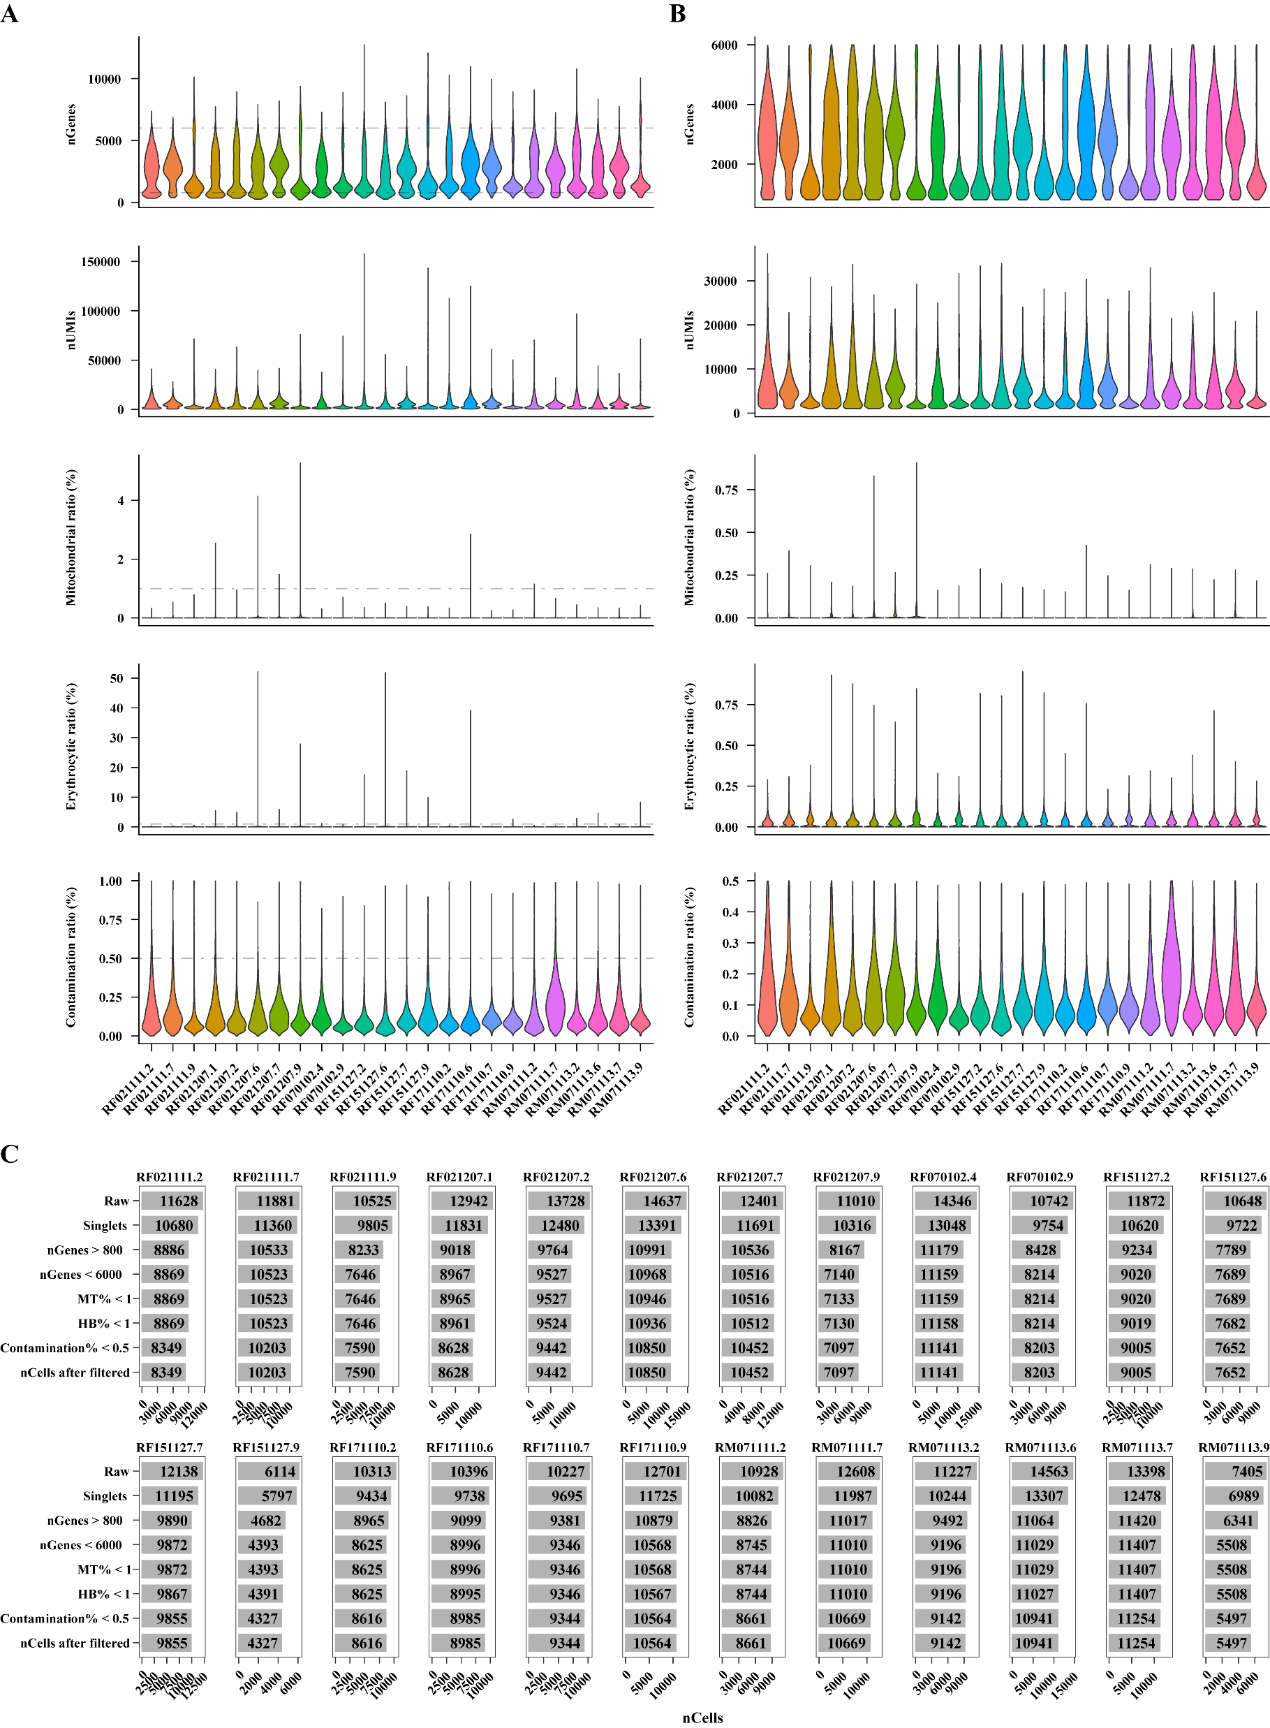


**Figure S19.** Quality control of single-nucleus RNA-seq samples. (A-B) Distributions of key quality control (QC) metrics before (A) and after (B) filtering, including the number of detected genes per nucleus (nGenes), total unique molecular identifiers (nUMIs), mitochondrial gene fraction, erythrocytic gene contamination ratio, and ambient RNA contamination ratio. (C) The number of retained nuclei per sample following each QC step.


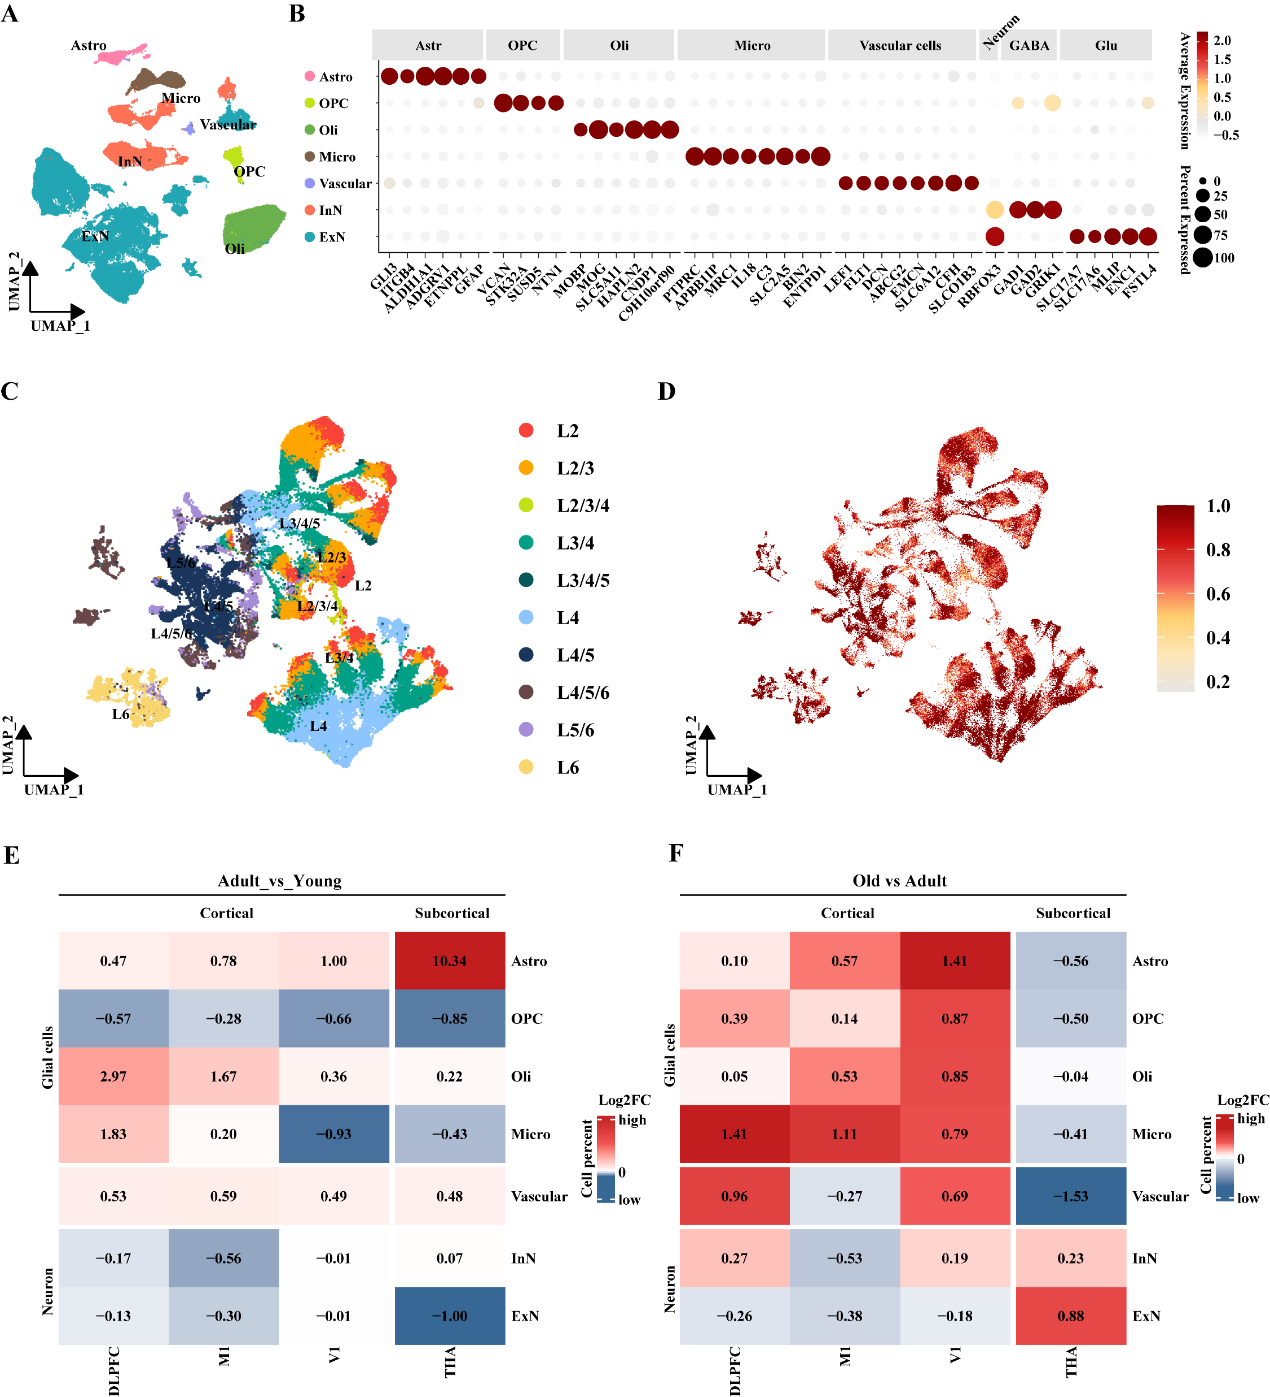


**Figure S20.** Annotation and characterization of major brain cell types and excitatory neuron subtypes. (A) UMAP visualization showing the overall distribution of nuclei, color-coded by seven annotated major cell classes. (B) Dot plot displaying the top-ranked marker genes for each major cell class, with dot size representing the proportion of cells expressing the gene and dot color indicating the average expression level. (C) UMAP visualization of the mapped excitatory neuron subtypes, with colors corresponding to annotated subtypes. (D) Prediction confidence of cell-type annotations. The UMAP is color-coded by predicted probability scores (0–1), where deep red represents high confidence (probability >0.8) and light yellow indicates low confidence (probability <0.4). (E-F) Changes in cellular composition between developmental stages, showing differences from juvenile to adult (E) and from adult to aged stages (F).


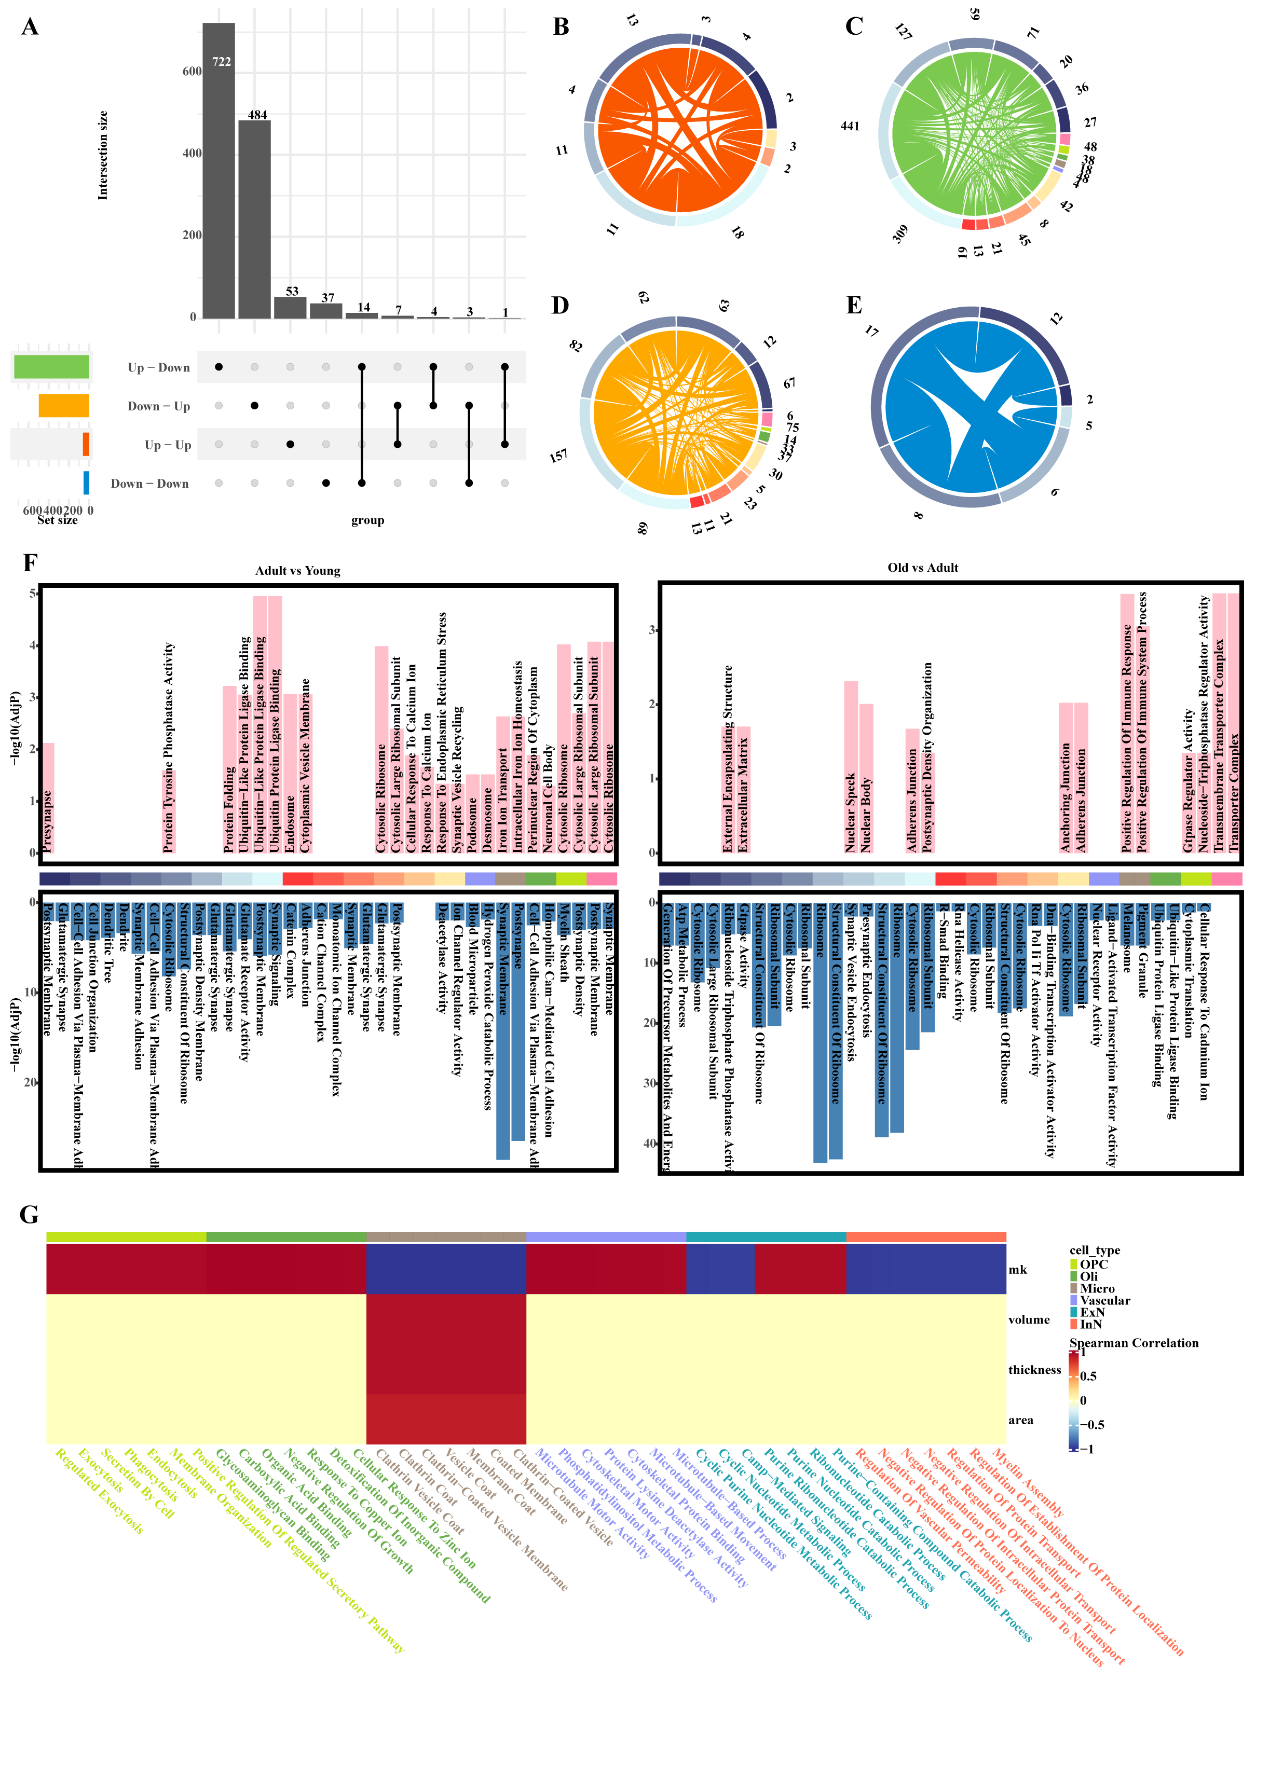


**Figure S21.**Transcriptional signatures of DLPFC during development and aging. (A) Distribution of DLPFC DEGs. DEGs were identified for two transitions: juvenile-to-adult and adult-to-aged, and grouped into distinct expression patterns. (B-E) Four temporal expression patterns in the DLPFC. Persistent increase, increase-then-decrease, decrease-then-increase, and persistent decrease, showing the distribution of genes across cell types. (F) Functional enrichment of DLPFC DEGs. Left: enriched terms for up- and downregulated genes from juvenile to adult transition. Right: enriched terms for the adult to aged transition. (G) Integration of DLPFC structural and molecular trajectories. Spearman correlation was computed between structural trajectories (from GAMLSS models) and average expression trajectories of significantly enriched pathways. Only associations with a threshold >= 0.99 are shown.


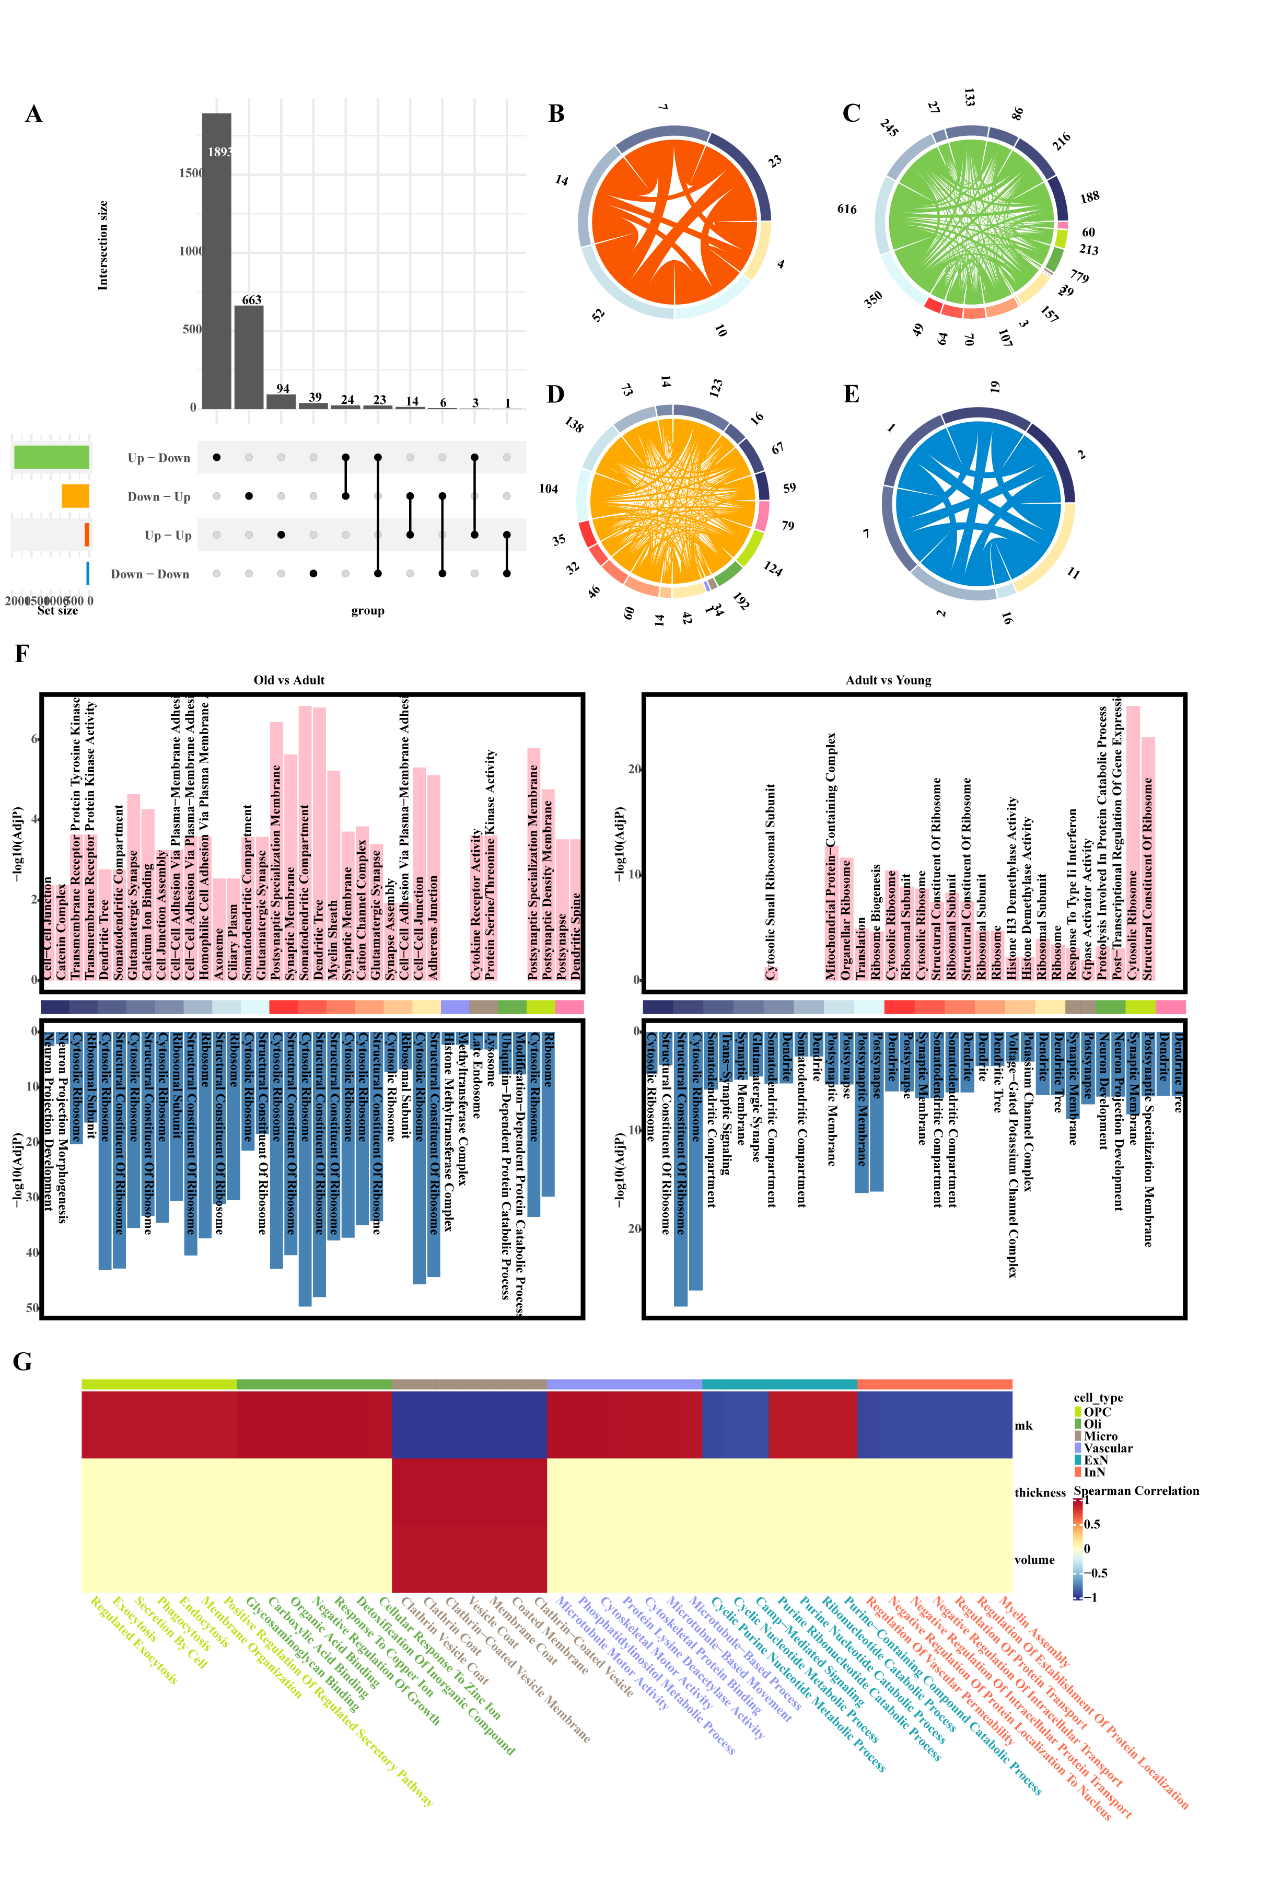


**Figure S22.**Transcriptional signatures of M1 during development and aging. (A) Distribution of M1 DEGs. DEGs were identified for two transitions: juvenile-to-adult and adult-to-aged, and grouped into distinct expression patterns. (B-E) Four temporal expression patterns in the M1. Persistent increase, increase-then-decrease, decrease-then-increase, and persistent decrease, showing the distribution of genes across cell types. (F) Functional enrichment of M1 DEGs. Left: enriched terms for up- and downregulated genes from juvenile to adult transition. Right: enriched terms for the adult to aged transition. (G) Integration of M1 structural and molecular trajectories. Spearman correlation was computed between structural trajectories (from GAMLSS models) and average expression trajectories of significantly enriched pathways. Only associations with a threshold >= 0.99 are shown.


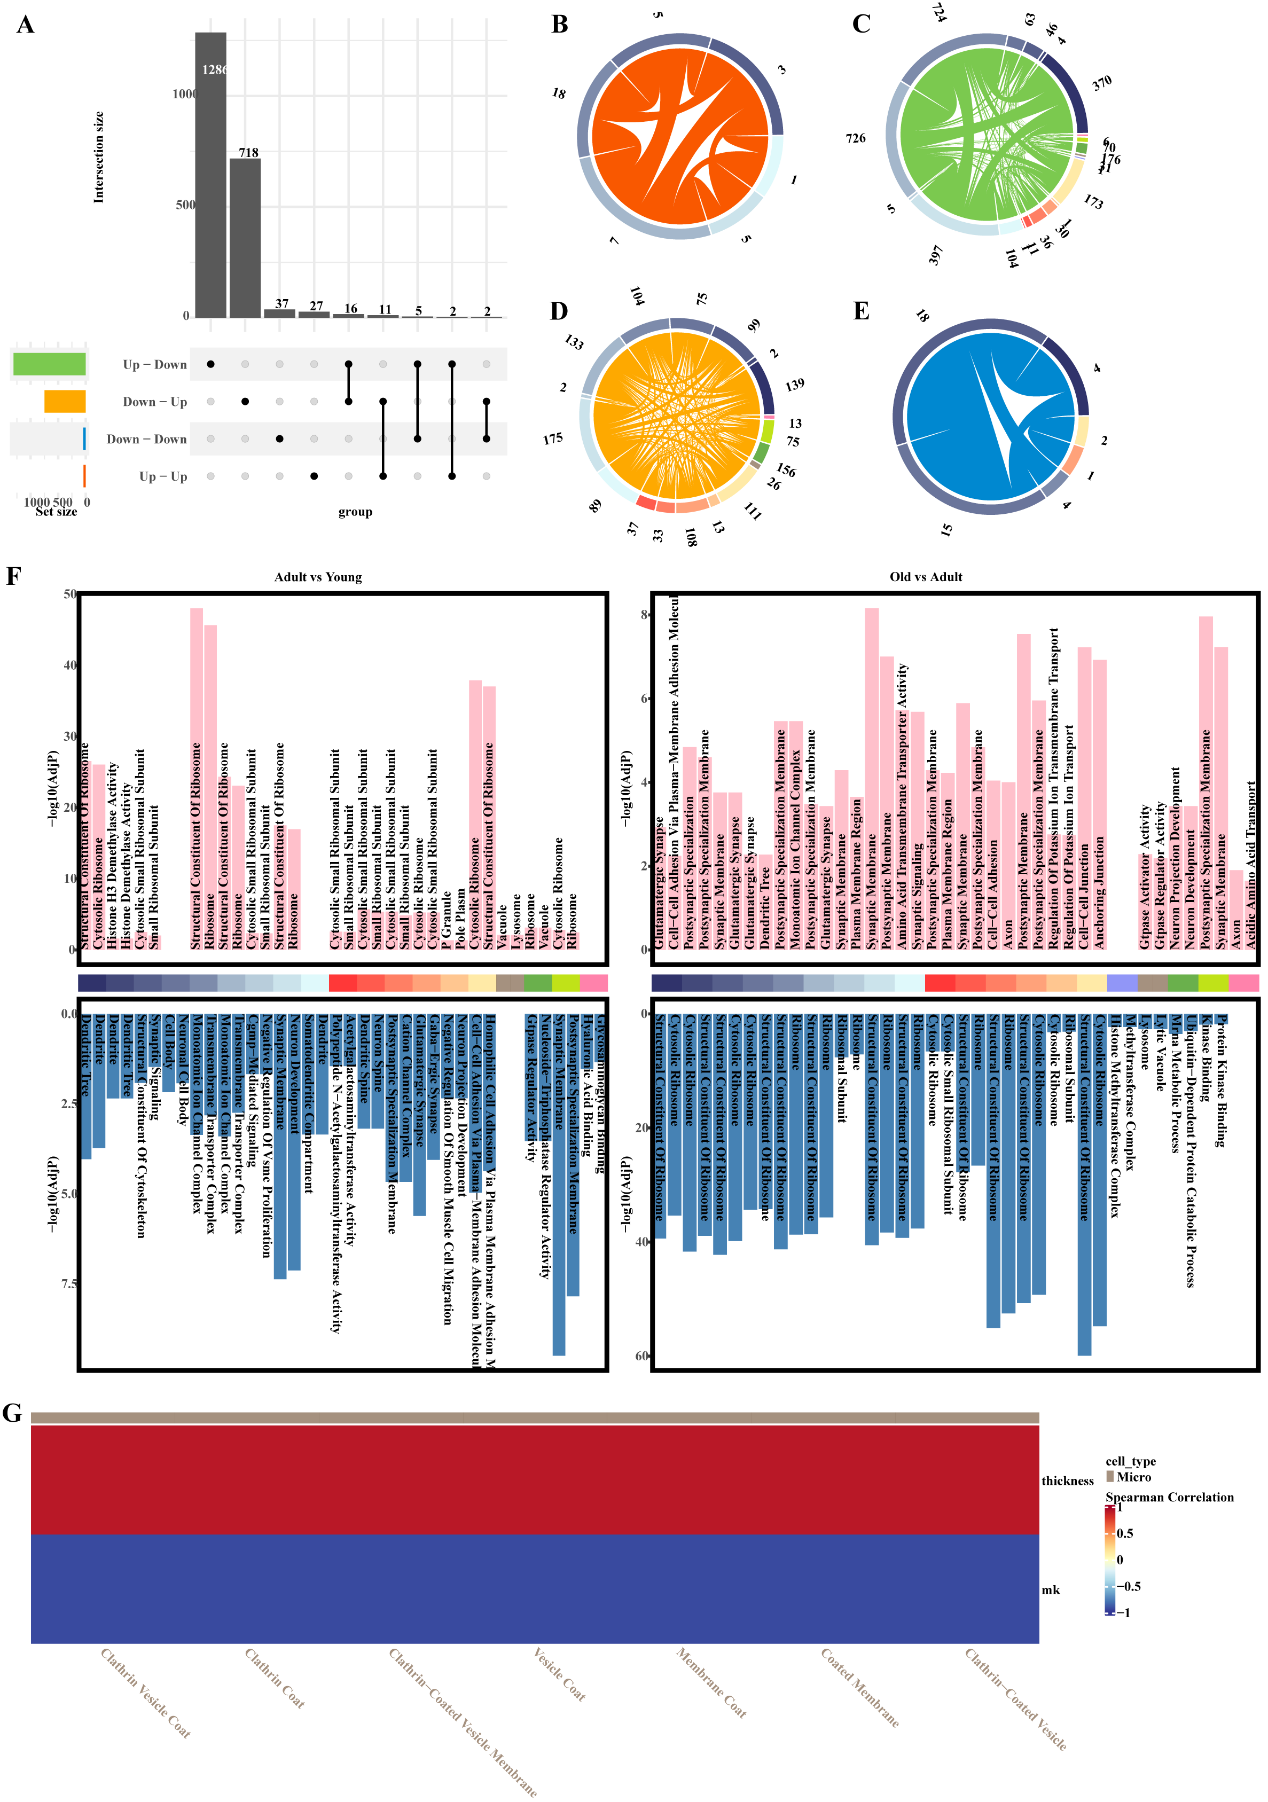


**Figure S23.**Transcriptional signatures of V1 during development and aging. (A) Distribution of V1 DEGs. DEGs were identified for two transitions: juvenile-to-adult and adult-to-aged, and grouped into distinct expression patterns. (B-E) Four temporal expression patterns in the V1. Persistent increase, increase-then-decrease, decrease-then-increase, and persistent decrease, showing the distribution of genes across cell types. (F) Functional enrichment of V1 DEGs. Left: enriched terms for up- and downregulated genes from juvenile to adult transition. Right: enriched terms for the adult to aged transition. (G) Integration of V1 structural and molecular trajectories. Spearman correlation was computed between structural trajectories (from GAMLSS models) and average expression trajectories of significantly enriched pathways. Only associations with a threshold >= 0.99 are shown.


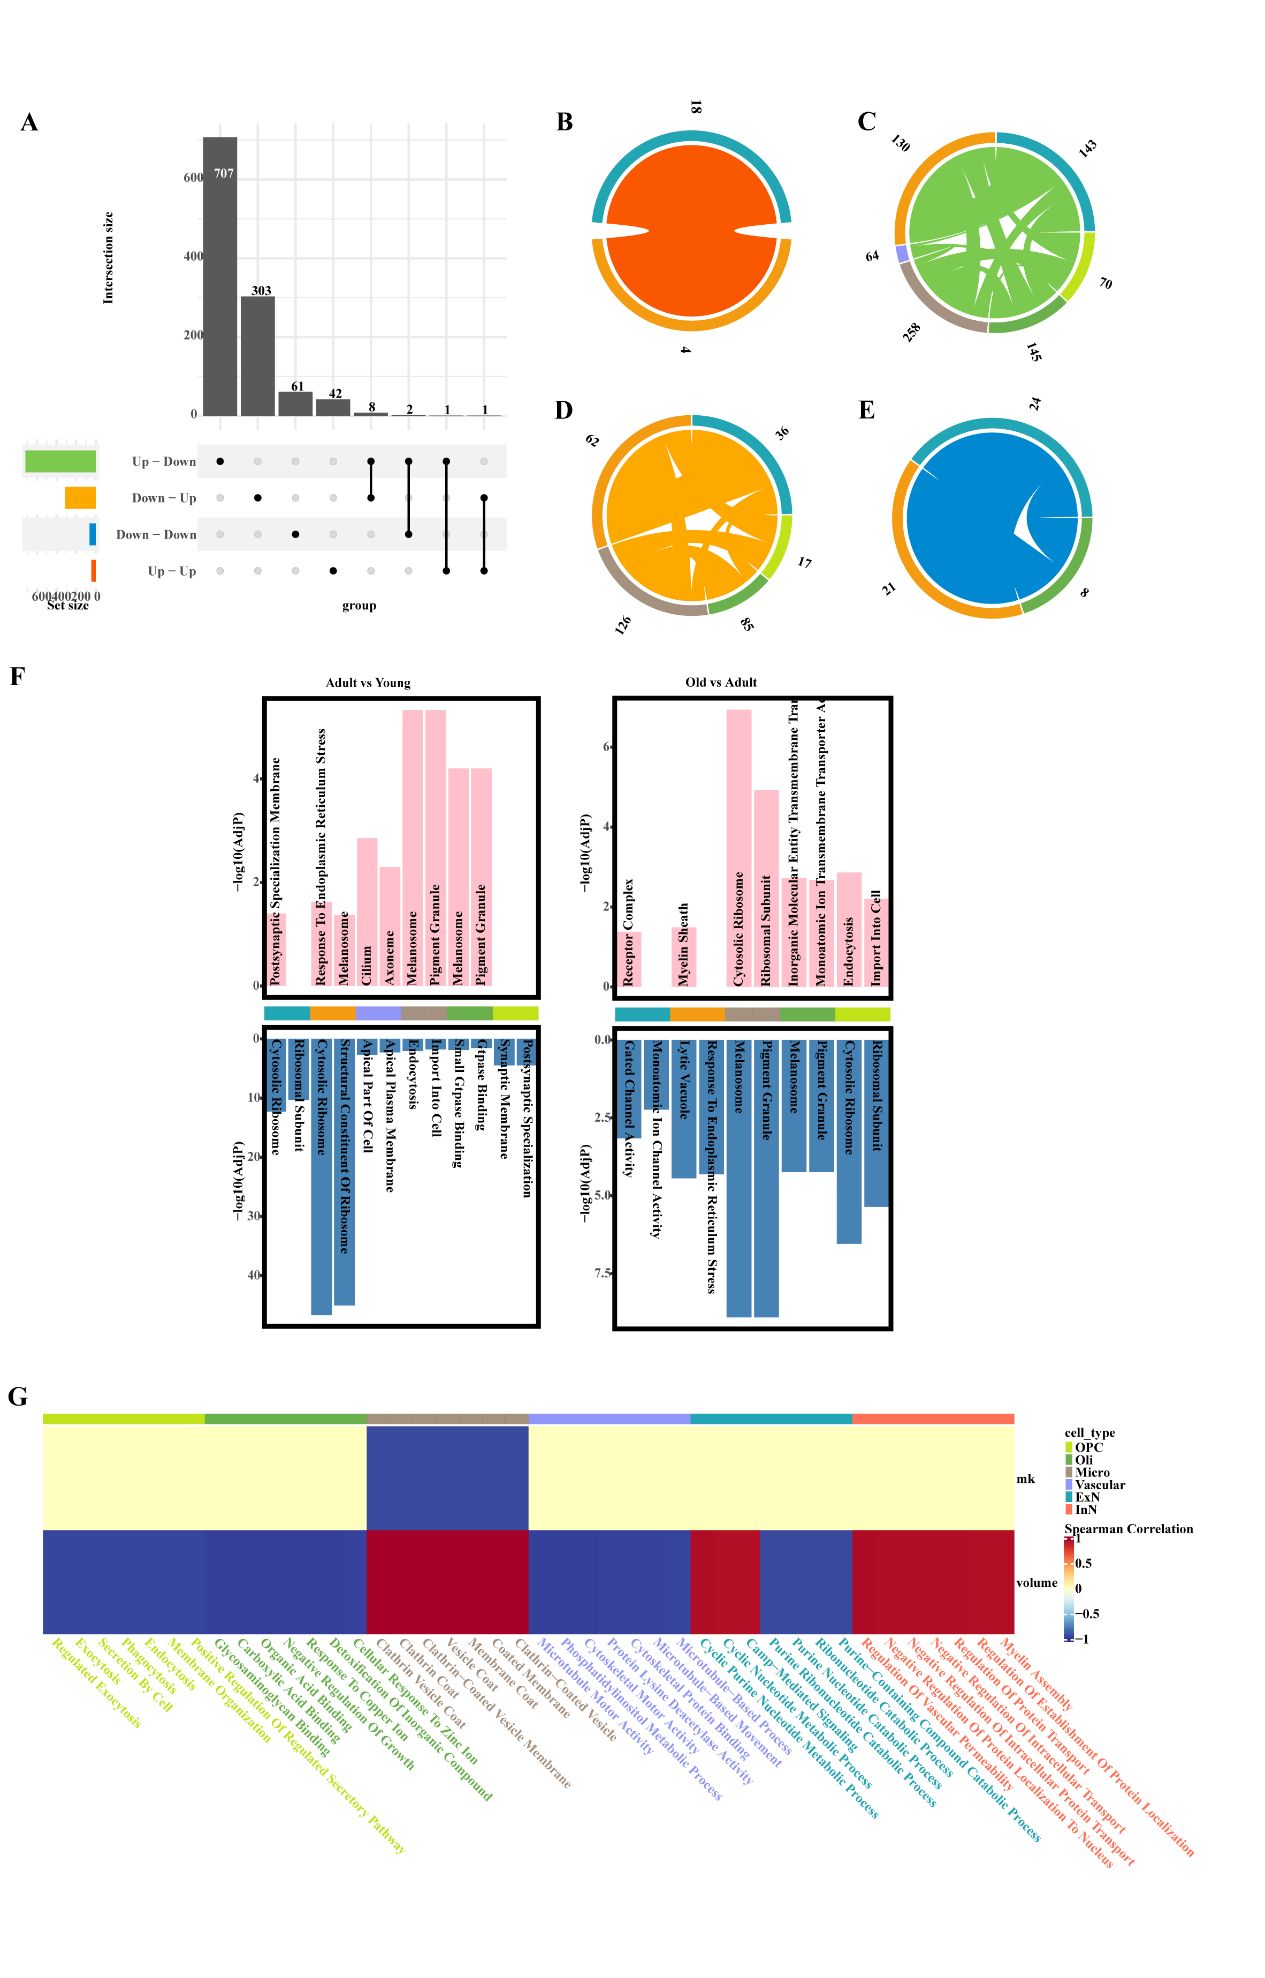


**Figure S24.**Transcriptional signatures of THA during development and aging. (A) Distribution of THA DEGs. DEGs were identified for two transitions: juvenile-to-adult and adult-to-aged, and grouped into distinct expression patterns. (B-E) Four temporal expression patterns in the THA. Persistent increase, increase-then-decrease, decrease-then-increase, and persistent decrease, showing the distribution of genes across cell types. (F) Functional enrichment of THA DEGs. Left: enriched terms for up- and downregulated genes from juvenile to adult transition. Right: enriched terms for the adult to aged transition. (G) Integration of THA structural and molecular trajectories. Spearman correlation was computed between structural trajectories (from GAMLSS models) and average expression trajectories of significantly enriched pathways. Only associations with a threshold >= 0.99 are shown.


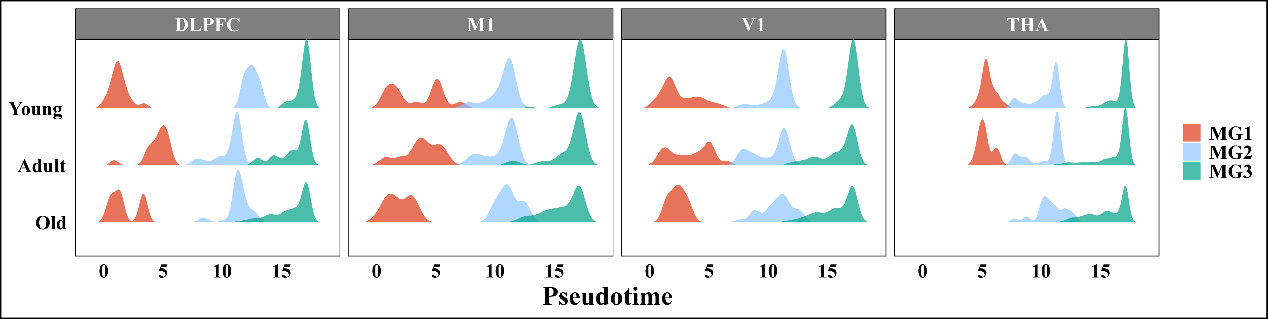


**Figure S25.**The pseudotemporal distribution of different microglial states across various samples, illustrating the dynamic transitions of microglia during development and aging.


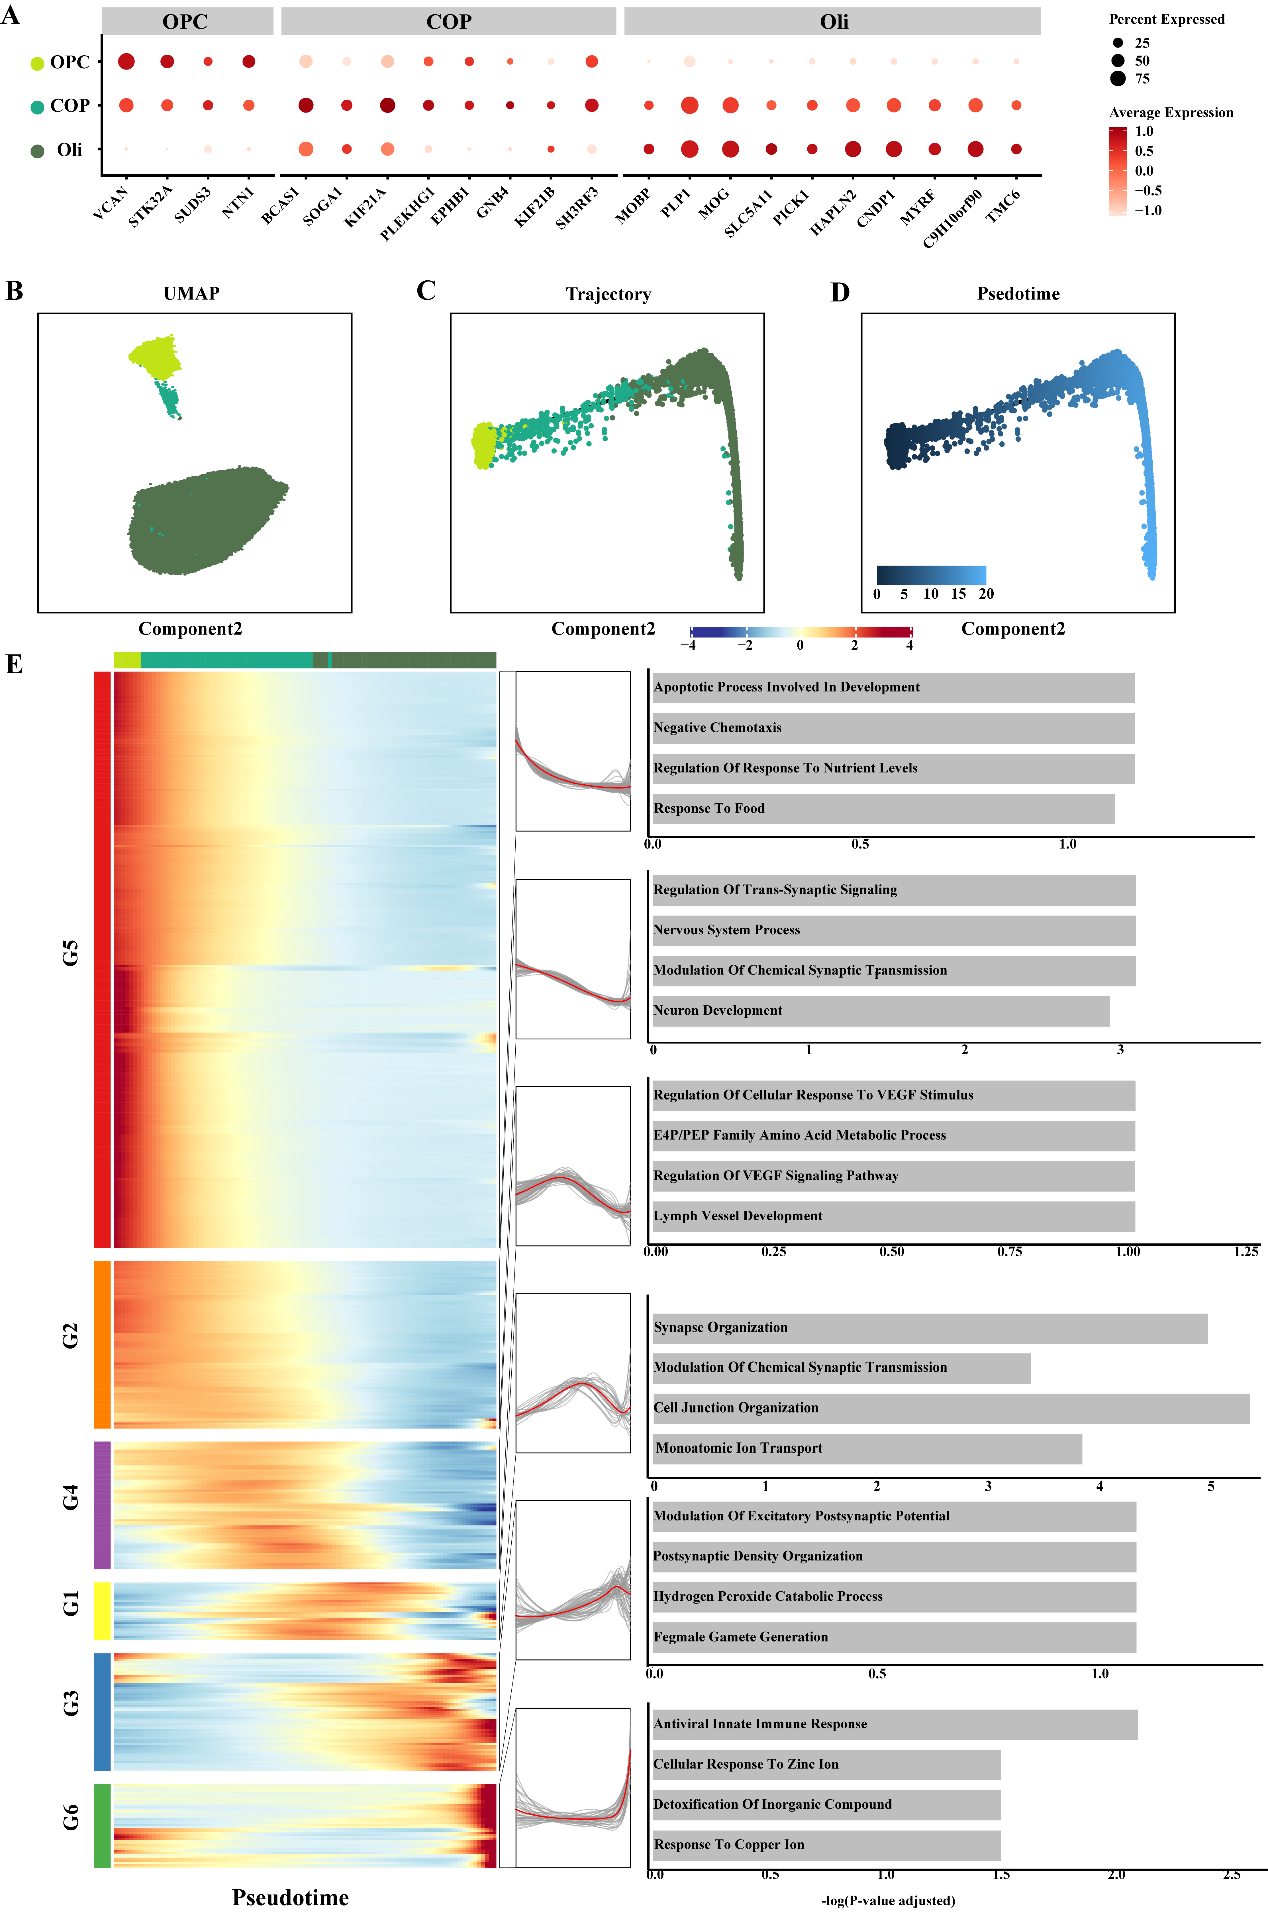


**Figure S26.** Pseudotemporal analysis of the oligodendrocyte lineage. (A) Dot plot showing the expression levels of canonical marker genes for oligodendrocyte precursor cells (OPCs), committed oligodendrocyte precursor cells (COPs), and mature oligodendrocytes (Olis), where dot size represents the proportion of expressing cells and color intensity indicates average expression level. (B) UMAP visualization of the distribution of oligodendrocyte lineage cells. (C) UMAP visualization showing the distribution of each cell subtype along the pseudotemporal trajectory. (D) UMAP visualization colored by inferred pseudotime, reflecting the progressive differentiation of oligodendrocyte lineage cells. (E) Heatmap of DEGs. Expression profiles of DEGs across six clusters are shown, with representative enriched GO-BP terms related to regeneration (adjustP < 0.05).


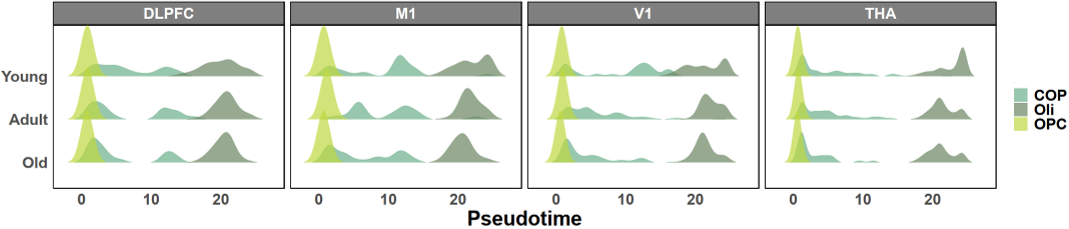


**Figure S27.**The pseudotemporal distribution of oligodendrocyte lineage across various samples, illustrating the dynamic transitions of oligodendrocyte during development and aging.
